# Supplementary material
Source: publisher site journal article supplement (https://www.dovepress.com/article/389811)
Supplement: Supplementary file 1 [file get_supplementary_file.php]

Supplementary Material

**Supplementary Figures**


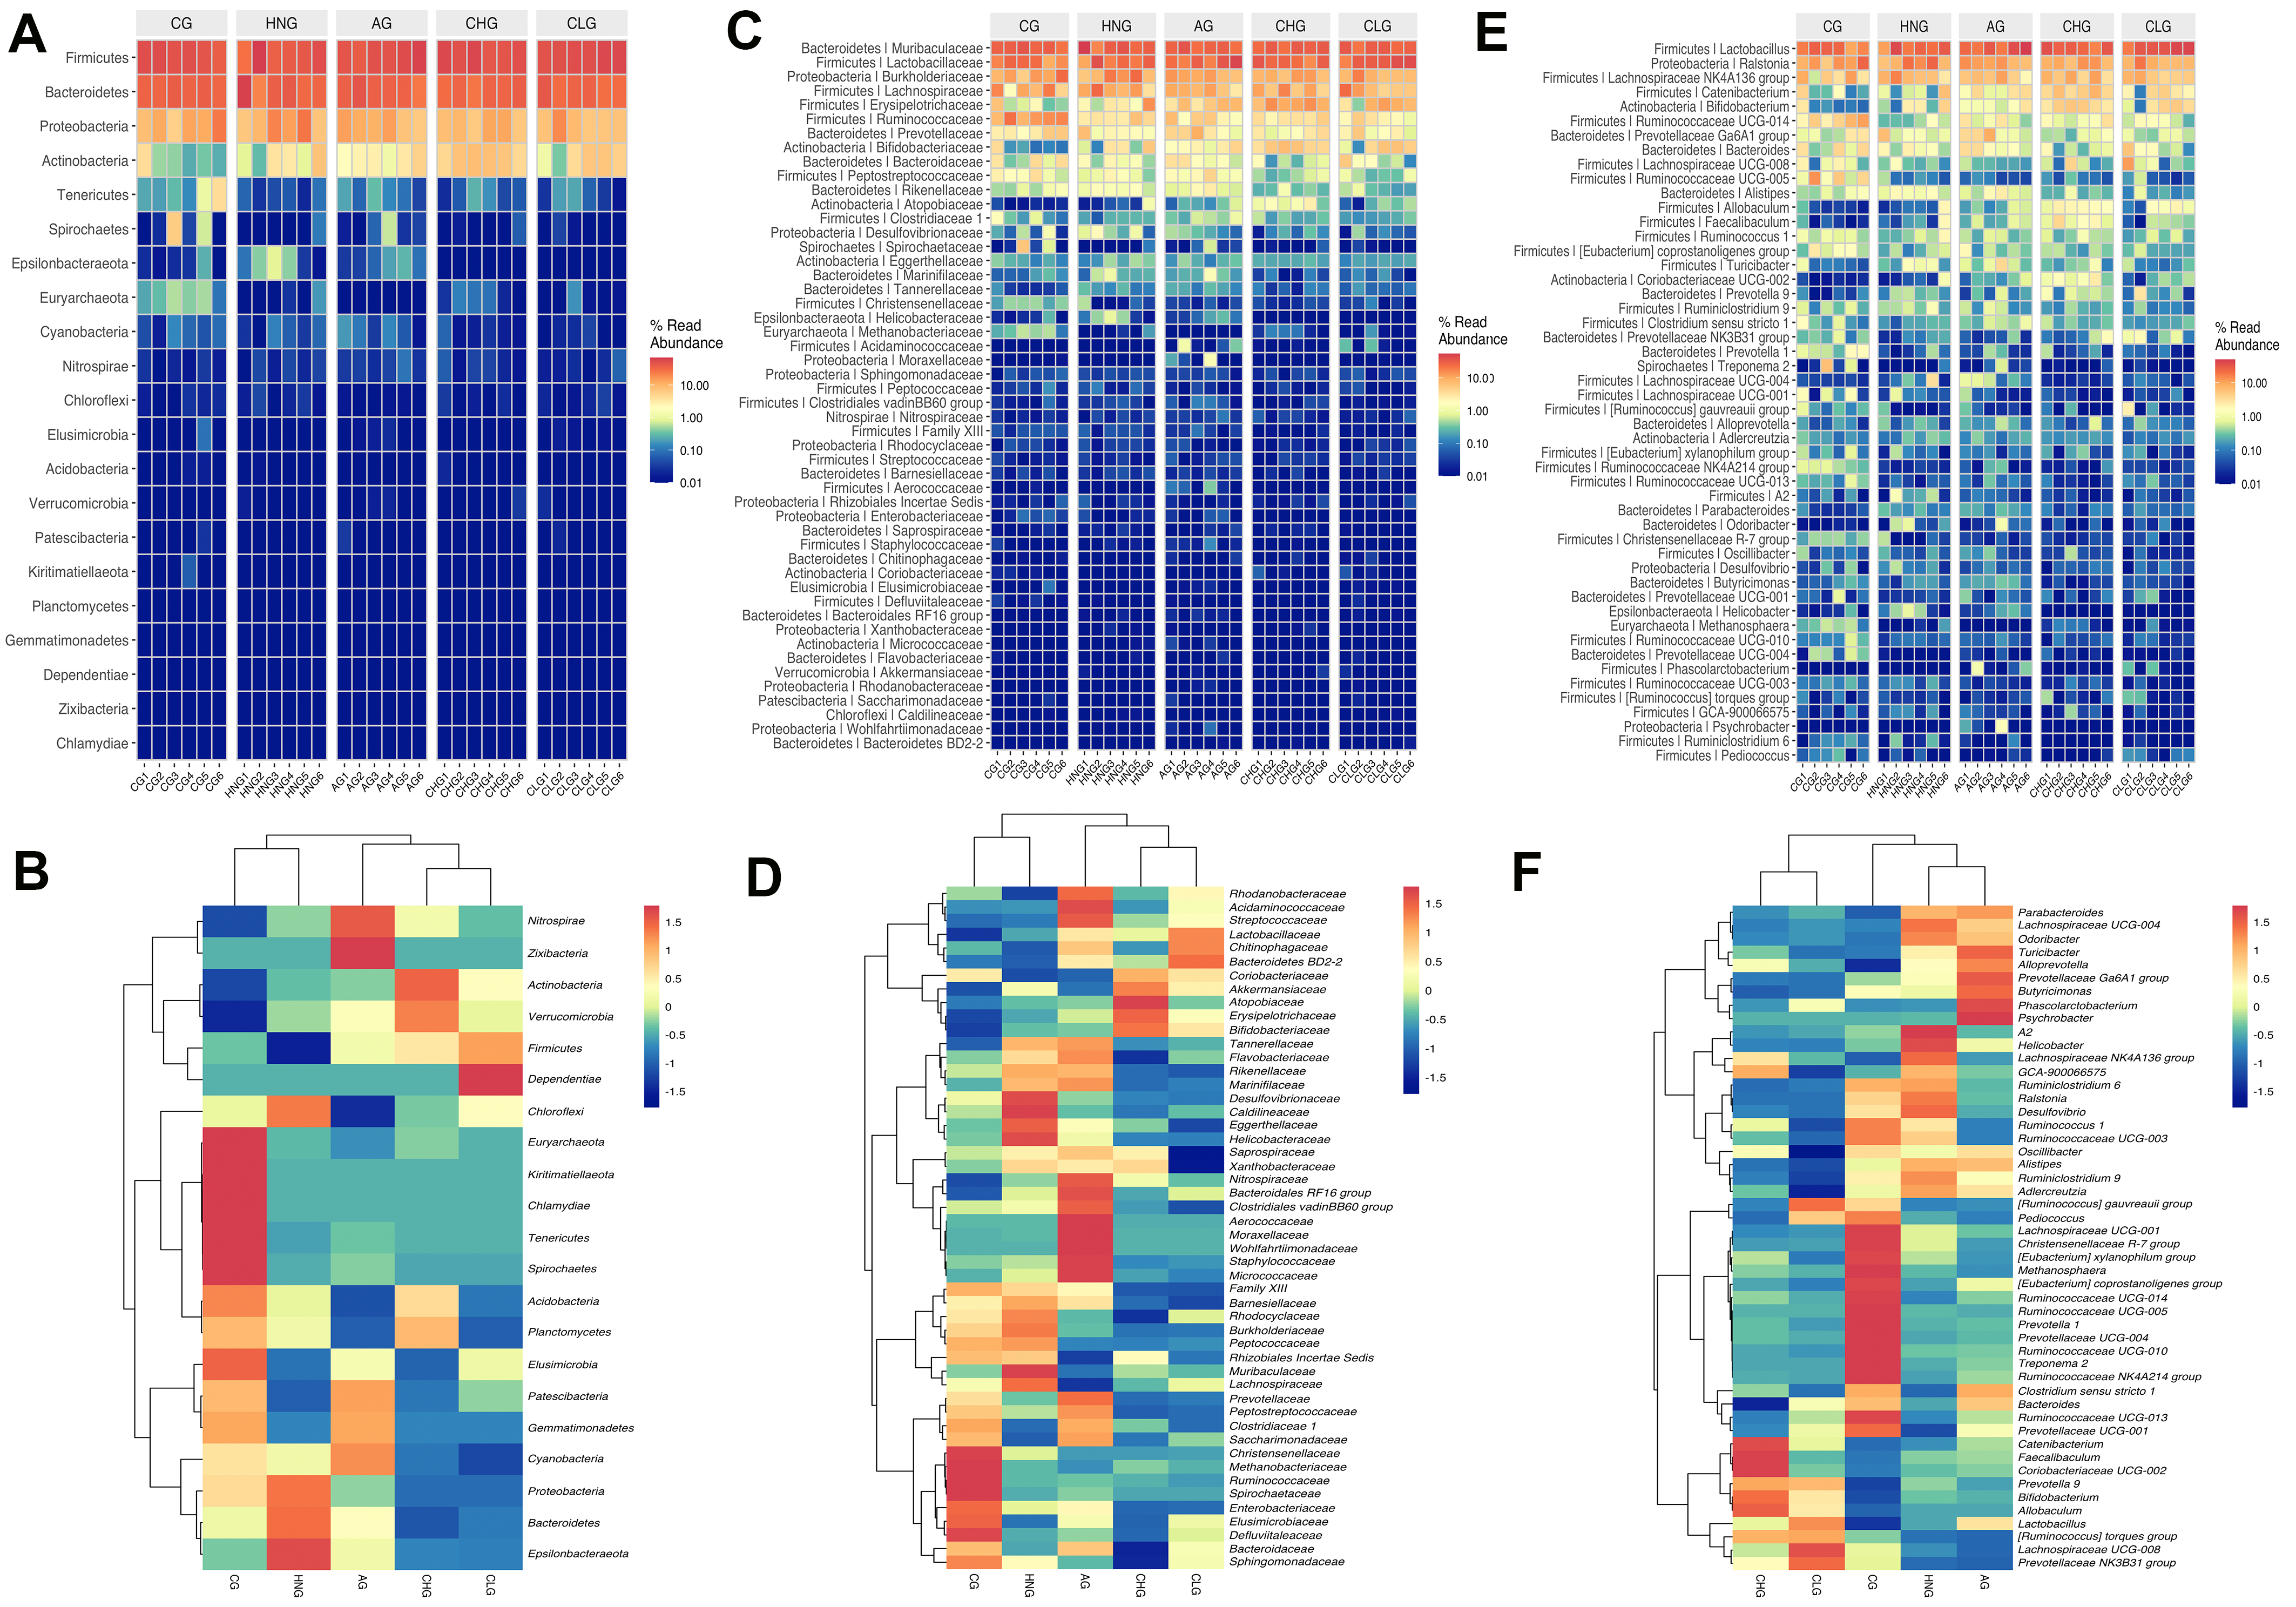


**Figure S1** Community composition analysis of gut microbiota restored by CILF in HN. (**A**) Heatmap of high abundance in different samples at Phylum level. (**B**) Cluster heatmap of high abundance species in different samples at Phylum level. (**C**) Heatmap of high abundance in different samples at the Family level. (**D**) Cluster heatmap of high abundance species in different samples at the Family level. (**E**) Heatmap of high abundance in different samples at Genus level. (**F**) Cluster heatmap of high abundance species in different samples at Genus level.

**
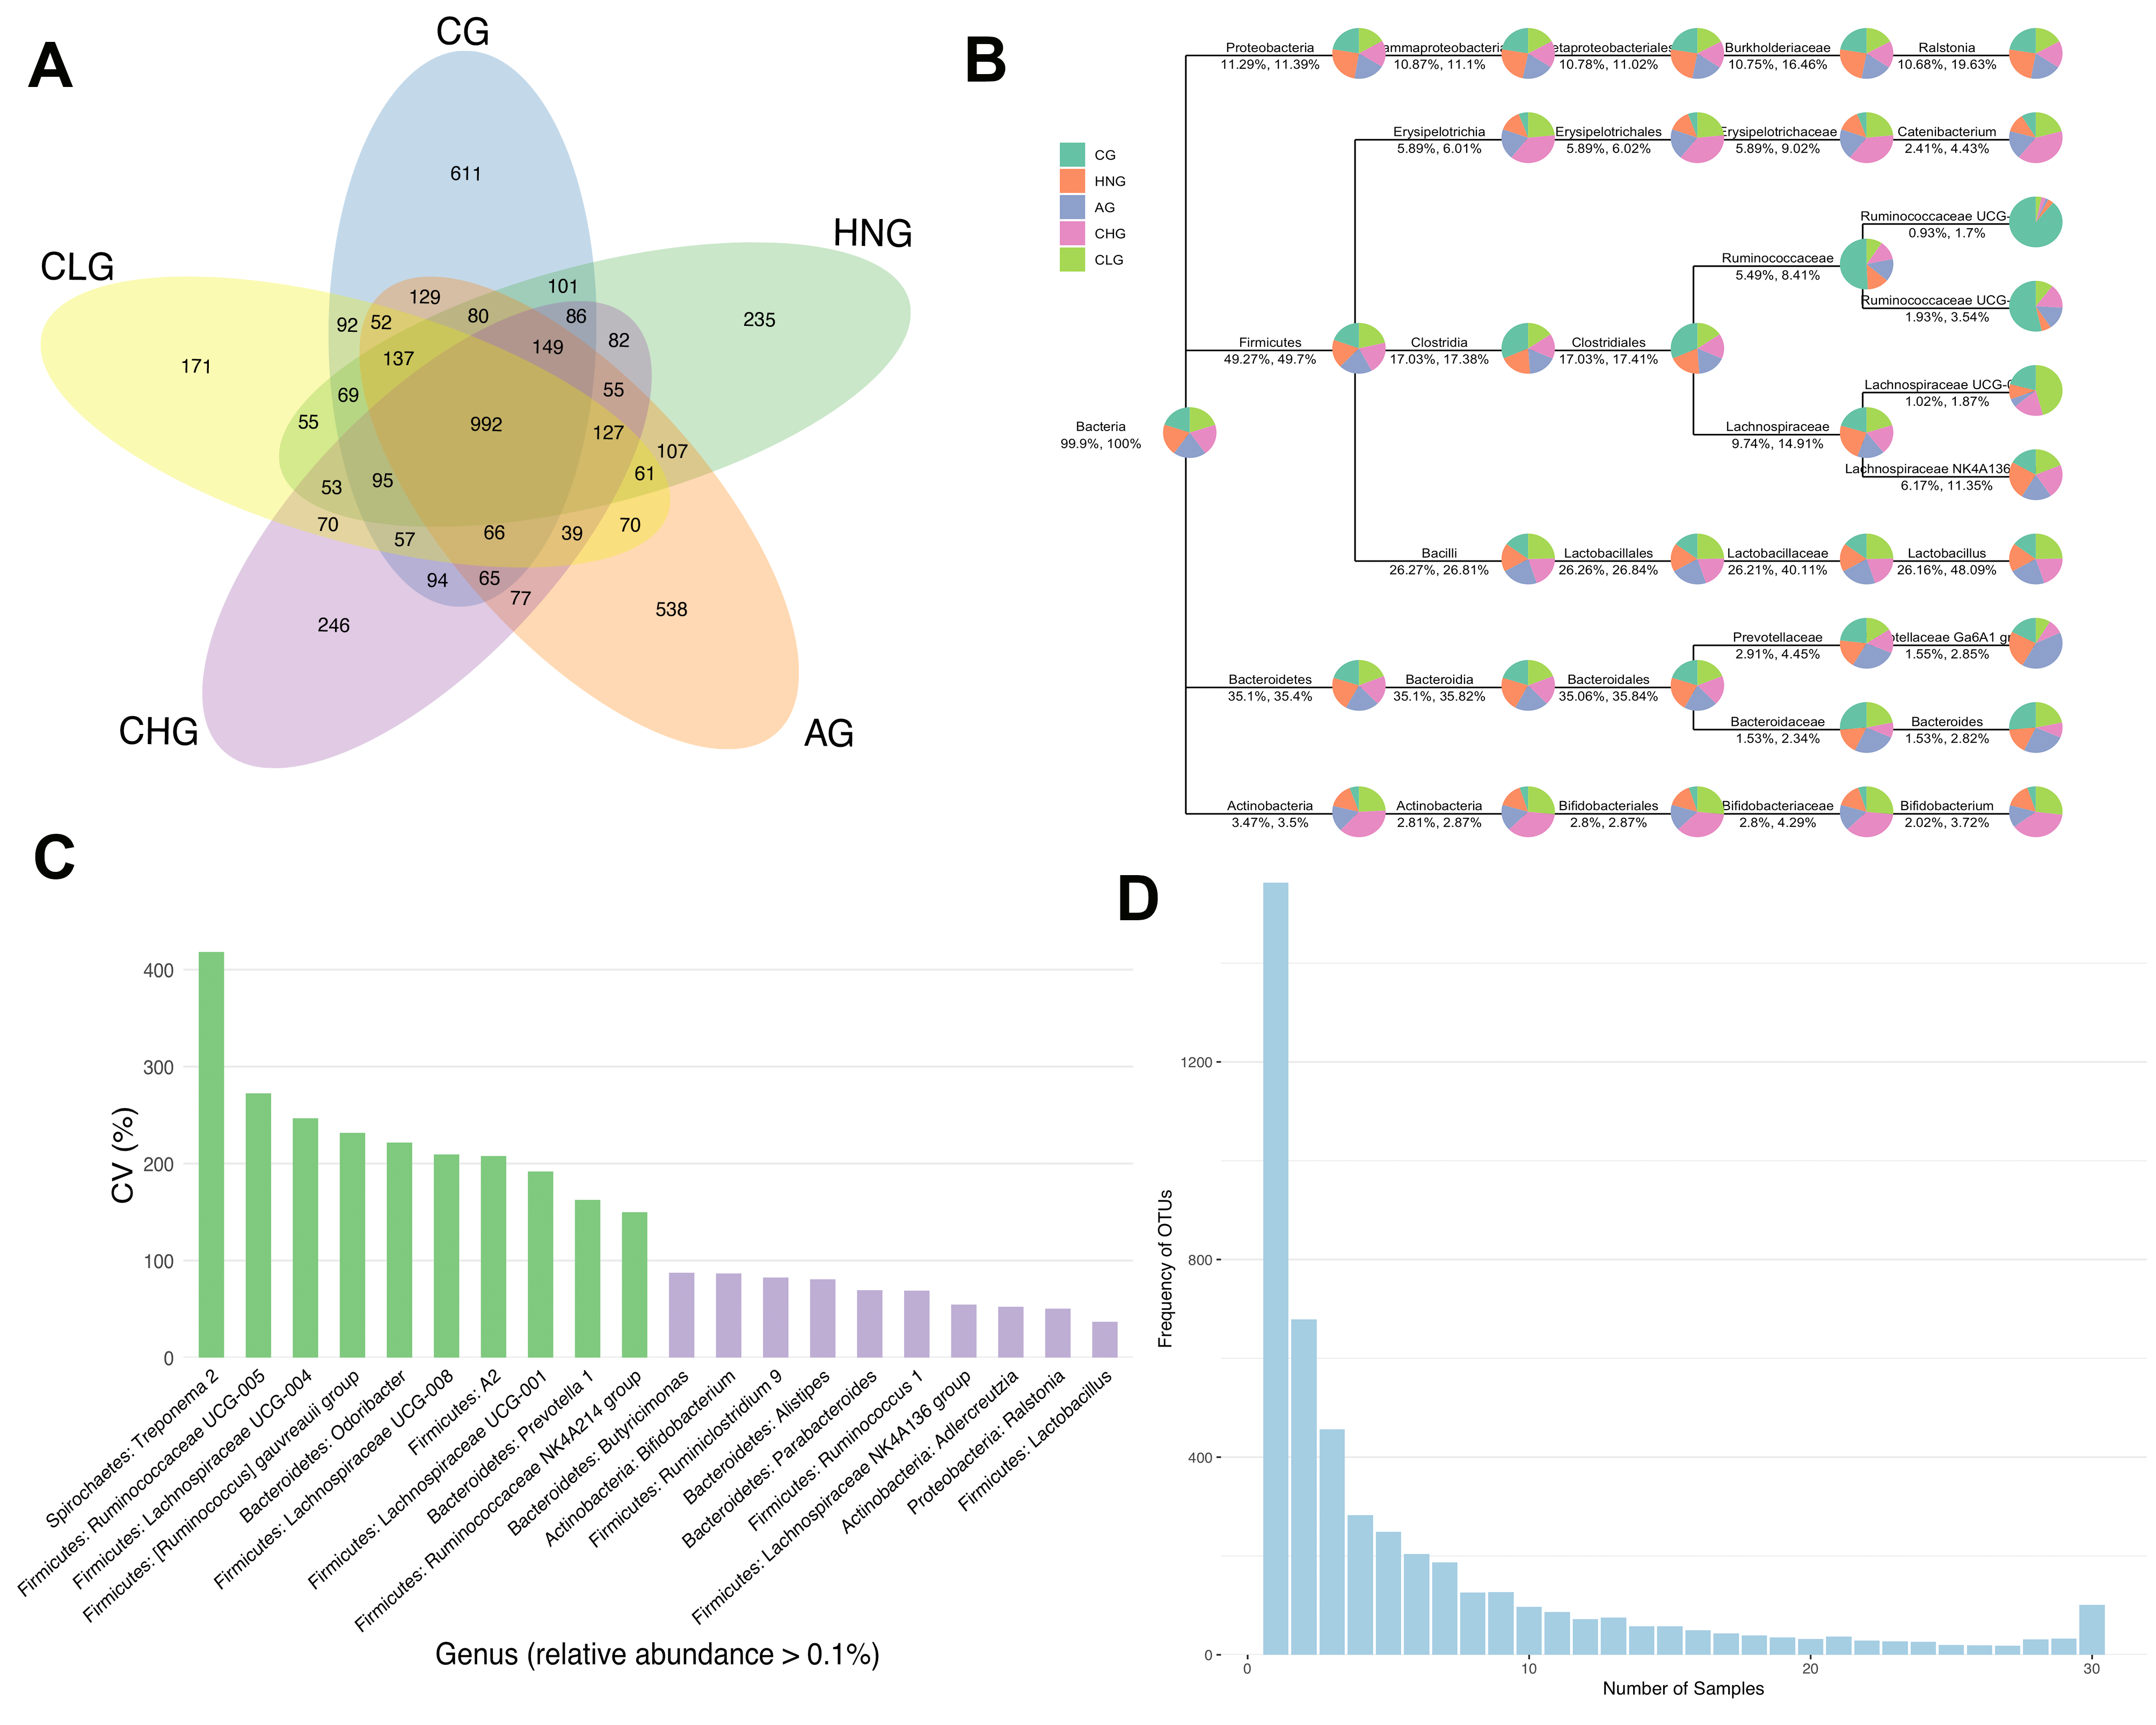
**

**Figure S2** CILF regulates the proportion of related bacteria and the balance of community composition. (**A**) Venn diagram analysis of differences in OTU distribution in each group. (**B**) specific taxonomic tree. (**C**) Coefficient of variation. (**D**) OTU frequency.

**Table S1** Primers Used in the Quantitative Real-time PCR

| Gene | Forward Primer Sequence  (5’→3’) | Reverse Primer Sequence  (5’→3’) |
| --- | --- | --- |
| *β-actin* | TGTCACCAACTGGGACGATA | GGGGTGTTGAAGGTCTCAAA |
| *Stat3* | TGAGGGAGCAGAGATGTGGG | CTGGCAAGGAGTGGGTCTCT |
| *Vegfa* | CACGACAGAAGGGGAGCAGAAAG | GGCACACAGGACGGCTTGAAG |
| *Sirt1* | ACGCCTTATCCTCTAGTTCCTGTGG | CGGTCTGTCAGCATCATCTTCCAAG |

**Table S2** Characterization of Chemical Constituents of CILF by UPLC-Q/Orbitrap HRMS

| No. | tR (min) | [M-H]- m/z | Error | Formula | MS/MS fragment ions | Identification |
| --- | --- | --- | --- | --- | --- | --- |
| 1 | 2.558 | 391.1250 | 1.02 | C16H24O11 | 229.0718，185.0815，167.0707，149.0610 | shanzhiside |
| 2 | 4.380 | 353.0880 | 0.57 | C16H18O9 | 339.0500，229.0137，191.0557，179.0345，161.0238，135.0444 | Neochlorogenic acid |
| 3 | 5.363 | 353.0882 | 1.13 | C16H18O9 | 339.0500，229.0137，191.0557，179.0345，161.0238，135.0444 | Chlorogenic acid |
| 4 | 5.903 | 353.0883 | 1.42 | C16H18O9 | 339.0500，229.0137，191.0557，179.0345，161.0238，135.0444 | Cryptochlorogenic acid |
| 5 | 6.420 | 515.1199 | 0.78 | C25H24O12 | 461.5775，353.0881，191.0557，179.0344，161.0237，135.0443 | Isochlorogenic Acid B |
| 6 | 6.537 | 515.1199 | 0.78 | C25H24O12 | 461.5775，353.0881，191.0557，179.0344，161.0237，135.0443 | Isochlorogenic acid A |
| 7 | 6.661 | 515.1199 | 0.78 | C25H24O12 | 461.5775，353.0881，191.0557，179.0344，161.0237，135.0443 | Isochlorogenic acid C |
| 8 | 8.103 | 549.1826 | 0.18 | C23H34O15 | 517.1625，225.0767，207.0661 | genipin 1-gentiobioside |
| 9 | 9.217 | 415.1037 | 0.48 | C21H20O9 | 369.0143，337.0719，307.0610，295.0615，267.0666 | Puerarin |
| 10 | 9.367 | 433.1351 | 0.00 | C18H26O12 | 387.2018，343.6566，225.0768 | Capparoside A |
| 11 | 9.990 | 547.1465 | 1.46 | C26H28O13 | 325.0717，295.0618，267.0667 | Puerarin 6''-O-xyloside |
| 12 | 11.337 | 415.1037 | 0.48 | C21H20O9 | 349.0692，307.0618，295.0615，267.0666，191.0561，161.0246，133.0289 | Daidzin |

| **Table S3** GO Analysis | | | | | | | | | |
| --- | --- | --- | --- | --- | --- | --- | --- | --- | --- |
| ID | Description | GeneRatio | BgRatio | P value | P.adjust | Qvalue | GeneID | | Count |
| GO:0005126 | cytokine receptor binding | 17/150 | 286/17697 | 3.42E-10 | 1.94E-07 | 1.33E-07 | CASP3/CASP8/TGFB1/VEGFA/IL10/TNF/IL6/IFNG/IL4  /CD40LG/IL1B/CCL2/CXCL8/JAK2/STAT3/CCR2/TLR9 | 17 | |
| GO:0004879 | nuclear receptor activity | 7/150 | 47/17697 | 1.29E-07 | 2.45E-05 | 1.68E-05 | AR/ESR1/PPARG/NR1I2/RXRA/PPARA/STAT3 | 7 | |
| GO:0098531 | transcription factor activity, direct ligand regulated sequence-specific DNA binding | 7/150 | 47/17697 | 1.29E-07 | 2.45E-05 | 1.68E-05 | AR/ESR1/PPARG/NR1I2/RXRA/PPARA/STAT3 | 7 | |
| GO:0047485 | protein N-terminus binding | 9/150 | 109/17697 | 3.68E-07 | 4.15E-05 | 2.85E-05 | TGFB1/RELA/TP53/NCOA1/PARP1/SLC6A3/HDAC1  /ERCC5/ATM | 9 | |
| GO:0003707 | steroid hormone receptor activity | 7/150 | 56/17697 | 4.47E-07 | 4.15E-05 | 2.85E-05 | AR/ESR1/PPARG/NR3C2/NR1I2/RXRA/PPARA | 7 | |
| GO:0019902 | phosphatase binding | 11/150 | 185/17697 | 5.11E-07 | 4.15E-05 | 2.85E-05 | BCL2/MAPK1/TP53/PPARG/SOD1/PPARA/SLC6A3/  HMGCR/STAT3/MAPK3/EIF2AK3 | 11 | |
| GO:0051427 | hormone receptor binding | 11/150 | 185/17697 | 5.11E-07 | 4.15E-05 | 2.85E-05 | NCOA2/ESR1/RB1/PPARG/NCOA1/RXRA/PARP1/  SIRT1/JAK2/STAT3/CDK7 | 11 | |
| GO:0035257 | nuclear hormone receptor binding | 10/150 | 152/17697 | 6.80E-07 | 4.83E-05 | 3.32E-05 | NCOA2/ESR1/RB1/PPARG/NCOA1/RXRA/PARP1/  SIRT1/STAT3/CDK7 | 10 | |
| GO:0001085 | RNA polymerase II transcription factor binding | 10/150 | 155/17697 | 8.13E-07 | 5.14E-05 | 3.53E-05 | JUN/AR/ESR1/RB1/TP53/PPARG/PPARA/HDAC1  /FBP1/STAT3 | | 10 |
| GO:0005536 | glucose binding | 4/150 | 11/17697 | 1.56E-06 | 8.89E-05 | 6.10E-05 | G6PD/GCK/GYS1/PYGL | | 4 |
| GO:0070851 | growth factor receptor binding | 9/150 | 134/17697 | 2.10E-06 | 0.000106 | 7.28E-05 | VEGFA/IL10/IL6/APP/IL4/IL1B/JAK2/ERN1/TLR9 | | 9 |
| GO:0020037 | heme binding | 9/150 | 135/17697 | 2.24E-06 | 0.000106 | 7.28E-05 | PTGS2/NOS3/CYP3A4/CYP17A1/CYP2C19/JAK2  /CYP11B2/TPO/CYP2C9 | | 9 |
| GO:0005125 | cytokine activity | 11/150 | 220/17697 | 2.80E-06 | 0.000123 | 8.42E-05 | TGFB1/VEGFA/IL10/TNF/IL6/IFNG/IL4/CD40LG  /IL1B/CCL2/CXCL8 | | 11 |
| GO:0046906 | tetrapyrrole binding | 9/150 | 145/17697 | 4.04E-06 | 0.000164 | 0.000112695 | PTGS2/NOS3/CYP3A4/CYP17A1/CYP2C19/JAK2  /CYP11B2/TPO/CYP2C9 | | 9 |
| GO:0097153 | cysteine-type endopeptidase activity involved in apoptotic process | 4/150 | 15/17697 | 6.29E-06 | 0.000235 | 0.000161524 | CASP9/CASP3/CASP8/CASP1 | | 4 |
| GO:0051219 | phosphoprotein binding | 7/150 | 83/17697 | 6.62E-06 | 0.000235 | 0.000161524 | MAPK1/RB1/PLAT/MAPK3/VAV1/NEDD4/MTOR | | 7 |
| GO:0050662 | coenzyme binding | 12/150 | 291/17697 | 7.14E-06 | 0.000239 | 0.000164063 | XDH/NOS3/PARP1/G6PD/HMGCR/SIRT1/ALDH2/  GAPDH/PYGM/PYGL/LDHA/GSR | | 12 |
| GO:0016616 | oxidoreductase activity, acting on the CH-OH group of donors, NAD or NADP as acceptor | 8/150 | 119/17697 | 7.83E-06 | 0.00024 | 0.000164835 | AKR1B1/G6PD/HMGCR/HSD3B2/ABCC4/LDHA  /ADH1B/ADH7 | | 8 |
| GO:0097718 | disordered domain specific binding | 5/150 | 33/17697 | 8.02E-06 | 0.00024 | 0.000164835 | RB1/TP53/GAPDH/HSP90AA1/BCL2L2 | | 5 |
| GO:0035258 | steroid hormone receptor binding | 7/150 | 92/17697 | 1.31E-05 | 0.000363 | 0.000249009 | ESR1/RB1/PPARG/NCOA1/PARP1/STAT3/CDK7 | | 7 |
| GO:0016614 | oxidoreductase activity, acting on CH-OH group of donors | 8/150 | 128/17697 | 1.34E-05 | 0.000363 | 0.000249009 | AKR1B1/G6PD/HMGCR/HSD3B2/ABCC4/LDHA  /ADH1B/ADH7 | | 8 |
| GO:0008395 | steroid hydroxylase activity | 5/150 | 38/17697 | 1.64E-05 | 0.000424 | 0.000290976 | CYP3A4/CYP17A1/CYP2C19/CYP11B2/CYP2C9 | | 5 |
| GO:1901338 | catecholamine binding | 4/150 | 20/17697 | 2.16E-05 | 0.000535 | 0.00036701 | ADRB2/ADRA2A/SLC6A3/DRD2 | | 4 |
| GO:0019903 | protein phosphatase binding | 8/150 | 140/17697 | 2.57E-05 | 0.000609 | 0.000417762 | BCL2/TP53/PPARG/SOD1/SLC6A3/HMGCR/STAT3/  EIF2AK3 | | 8 |
| GO:0001664 | G protein-coupled receptor binding | 11/150 | 280/17697 | 2.72E-05 | 0.00062 | 0.00042564 | CCL2/CXCL8/ADRA2A/ACE/JAK2/P2RY1/STAT3/  CCR2/AGTR1/NEDD4/WNT3A | | 11 |
| GO:0070491 | repressing transcription factor binding | 6/150 | 71/17697 | 3.05E-05 | 0.000668 | 0.000458383 | RELA/PPARG/MYC/PPARA/HDAC1/STAT3 | | 6 |
| GO:0031625 | ubiquitin protein ligase binding | 11/150 | 290/17697 | 3.76E-05 | 0.000791 | 0.000543173 | BCL2/JUN/CASP8/RELA/CDKN1A/RB1/TP53/  NFKBIA/HSP90AA1/PTPN22/USP7 | | 11 |
| GO:0031406 | carboxylic acid binding | 9/150 | 193/17697 | 4.00E-05 | 0.000814 | 0.000558426 | PPARG/NOS3/SELE/RXRA/PPARA/TYMS/PYGL/  FABP2/CASR | | 9 |
| GO:0043177 | organic acid binding | 9/150 | 205/17697 | 6.39E-05 | 0.001227 | 0.000842167 | PPARG/NOS3/SELE/RXRA/PPARA/TYMS/PYGL/  FABP2/CASR | | 9 |
| GO:0044389 | ubiquitin-like protein ligase binding | 11/150 | 308/17697 | 6.47E-05 | 0.001227 | 0.000842167 | BCL2/JUN/CASP8/RELA/CDKN1A/RB1/TP53/  NFKBIA/HSP90AA1/PTPN22/USP7 | | 11 |
| GO:0051400 | BH domain binding | 3/150 | 10/17697 | 6.86E-05 | 0.001259 | 0.000863781 | BCL2/BAX/BCL2L2 | | 3 |
| GO:0050661 | NADP binding | 5/150 | 52/17697 | 7.72E-05 | 0.001372 | 0.000941591 | NOS3/G6PD/HMGCR/GAPDH/GSR | | 5 |
| GO:0033613 | activating transcription factor binding | 6/150 | 85/17697 | 8.46E-05 | 0.001458 | 0.001000627 | JUN/RELA/RB1/PPARG/MYC/HDAC1 | | 6 |
| GO:0002020 | protease binding | 7/150 | 128/17697 | 0.00011 | 0.001794 | 0.001231324 | BCL2/CASP3/TNF/TP53/SERPINE1/COL1A1/SLC6A3 | | 7 |
| GO:0051287 | NAD binding | 5/150 | 56/17697 | 0.00011 | 0.001794 | 0.001231324 | PARP1/SIRT1/ALDH2/GAPDH/LDHA | | 5 |
| GO:0008227 | G protein-coupled amine receptor activity | 5/150 | 59/17697 | 0.000142 | 0.002179 | 0.001495768 | HTR2A/ADRB2/ADRA2A/DRD2/HTR1A | | 5 |
| GO:0097110 | scaffold protein binding | 5/150 | 59/17697 | 0.000142 | 0.002179 | 0.001495768 | CASP8/NOS3/P2RY1/MAPK3/HSP90AA1 | | 5 |
| GO:0051721 | protein phosphatase 2A binding | 4/150 | 32/17697 | 0.000148 | 0.00222 | 0.001523368 | BCL2/TP53/SLC6A3/HMGCR | | 4 |
| GO:0016725 | oxidoreductase activity, acting on CH or CH2 groups | 3/150 | 13/17697 | 0.00016 | 0.00234 | 0.001606077 | XDH/CYP3A4/CYP2C9 | | 3 |
| GO:0004497 | monooxygenase activity | 6/150 | 99/17697 | 0.000197 | 0.002796 | 0.001919278 | NOS3/CYP3A4/CYP17A1/CYP2C19/CYP11B2/CYP2C9 | | 6 |
| GO:0004707 | MAP kinase activity | 3/150 | 14/17697 | 0.000203 | 0.0028 | 0.001921896 | MAPK1/MAPK8/MAPK3 | | 3 |
| GO:0033293 | monocarboxylic acid binding | 5/150 | 64/17697 | 0.000209 | 0.0028 | 0.001921896 | PPARG/RXRA/PPARA/PYGL/FABP2 | | 5 |
| GO:0001103 | RNA polymerase II repressing transcription factor binding | 4/150 | 35/17697 | 0.000212 | 0.0028 | 0.001921896 | PPARG/PPARA/HDAC1/STAT3 | | 4 |
| GO:0048018 | receptor ligand activity | 13/150 | 482/17697 | 0.000238 | 0.00308 | 0.002113821 | TGFB1/VEGFA/IL10/TNF/IL6/IFNG/IL4/CD40LG/  IL1B/CCL2/CXCL8/TTR/WNT3A | | 13 |
| GO:0030374 | nuclear receptor transcription coactivator activity | 5/150 | 67/17697 | 0.000259 | 0.003274 | 0.002247014 | NCOA2/PPARG/NCOA1/NR1I2/PPARA | | 5 |
| GO:0004175 | endopeptidase activity | 12/150 | 427/17697 | 0.000287 | 0.003546 | 0.002433687 | CASP9/CASP3/CASP8/MMP3/PLAT/PREP/ACE  /CASP1/CAPN1/REN/USP7/MME | | 12 |
| GO:0042826 | histone deacetylase binding | 6/150 | 111/17697 | 0.000366 | 0.004319 | 0.002964605 | RELA/TP53/MAPK8/PARP1/HDAC1/HSP90AA1 | | 6 |
| GO:0004674 | protein serine/threonine kinase activity | 12/150 | 439/17697 | 0.000368 | 0.004319 | 0.002964605 | PIK3CG/MAPK1/CDK4/TOP1/MAPK8/MAPK3  /ERN1/CCND3/CDK7/MTOR/ATM/EIF2AK3 | | 12 |
| GO:0004935 | adrenergic receptor activity | 3/150 | 17/17697 | 0.000372 | 0.004319 | 0.002964605 | ADRB2/ADRA2A/DRD2 | | 3 |
| GO:0003713 | transcription coactivator activity | 10/150 | 319/17697 | 0.000398 | 0.004526 | 0.003106173 | NCOA2/JUN/RB1/PPARG/NCOA1/NR1I2/  RXRA/PPARA/CDK7/WNT3A | | 10 |
| GO:0016705 | oxidoreductase activity, acting on paired donors, with incorporation or reduction of molecular oxygen | 7/150 | 159/17697 | 0.000416 | 0.004618 | 0.003169685 | PTGS2/NOS3/CYP3A4/CYP17A1/CYP2C19/  CYP11B2/CYP2C9 | | 7 |
| GO:0030331 | estrogen receptor binding | 4/150 | 42/17697 | 0.000432 | 0.004618 | 0.003169685 | ESR1/PPARG/NCOA1/PARP1 | | 4 |
| GO:0048029 | monosaccharide binding | 5/150 | 75/17697 | 0.000438 | 0.004618 | 0.003169685 | G6PD/GCK/GYS1/FBP1/PYGL | | 5 |
| GO:0070405 | ammonium ion binding | 5/150 | 75/17697 | 0.000438 | 0.004618 | 0.003169685 | HTR2A/CRP/SLC6A3/DRD2/HTR1A | | 5 |
| GO:0004197 | cysteine-type endopeptidase activity | 6/150 | 116/17697 | 0.000463 | 0.004787 | 0.003285778 | CASP9/CASP3/CASP8/CASP1/CAPN1/USP7 | | 6 |
| GO:0016903 | oxidoreductase activity, acting on the aldehyde or oxo group of donors | 4/150 | 43/17697 | 0.000473 | 0.004808 | 0.003300186 | AKR1B1/ALDH2/GAPDH/ADH7 | | 4 |
| GO:0001091 | RNA polymerase II basal transcription factor binding | 3/150 | 20/17697 | 0.000612 | 0.005723 | 0.003928075 | AR/ESR1/TP53 | | 3 |
| GO:0001614 | purinergic nucleotide receptor activity | 3/150 | 20/17697 | 0.000612 | 0.005723 | 0.003928075 | P2RY1/P2RX3/P2RX7 | | 3 |
| GO:0016502 | nucleotide receptor activity | 3/150 | 20/17697 | 0.000612 | 0.005723 | 0.003928075 | P2RY1/P2RX3/P2RX7 | | 3 |
| GO:0016922 | nuclear receptor binding | 3/150 | 20/17697 | 0.000612 | 0.005723 | 0.003928075 | NCOA2/NCOA1/RXRA | | 3 |
| GO:0032813 | tumor necrosis factor receptor superfamily binding | 4/150 | 46/17697 | 0.000614 | 0.005723 | 0.003928075 | CASP3/CASP8/TNF/CD40LG | | 4 |
| GO:0016538 | cyclin-dependent protein serine/threonine kinase regulator activity | 4/150 | 49/17697 | 0.000781 | 0.007169 | 0.004920159 | CASP3/CDKN1A/CDK4/CCND3 | | 4 |
| GO:0045309 | protein phosphorylated amino acid binding | 4/150 | 51/17697 | 0.000909 | 0.008213 | 0.005636699 | MAPK1/MAPK3/VAV1/NEDD4 | | 4 |
| GO:0001223 | transcription coactivator binding | 3/150 | 23/17697 | 0.000933 | 0.008298 | 0.005695179 | ESR1/RELA/PPARA | | 3 |
| GO:0035586 | purinergic receptor activity | 3/150 | 25/17697 | 0.001197 | 0.01048 | 0.007192777 | P2RY1/P2RX3/P2RX7 | | 3 |
| GO:0005496 | steroid binding | 5/150 | 95/17697 | 0.001285 | 0.01108 | 0.007604326 | AR/ESR1/NR3C2/CYP3A4/SHBG | | 5 |
| GO:0001228 | DNA-binding transcription activator activity, RNA polymerase II-specific | 11/150 | 439/17697 | 0.001312 | 0.01114 | 0.007645554 | JUN/AR/ESR1/RELA/TP53/NR1I2/MYC  /PARP1/PPARA/SIRT1/STAT3 | | 11 |
| GO:0000980 | RNA polymerase II distal enhancer sequence-specific DNA binding | 5/150 | 99/17697 | 0.001544 | 0.012921 | 0.008868144 | JUN/RELA/TP53/SIRT1/HDAC1 | | 5 |
| GO:0004693 | cyclin-dependent protein serine/threonine kinase activity | 3/150 | 29/17697 | 0.001855 | 0.015082 | 0.010351228 | CDK4/CCND3/CDK7 | | 3 |
| GO:0051059 | NF-kappaB binding | 3/150 | 29/17697 | 0.001855 | 0.015082 | 0.010351228 | RELA/NFKBIA/HDAC1 | | 3 |
| GO:0005506 | iron ion binding | 6/150 | 152/17697 | 0.001886 | 0.015112 | 0.010371628 | XDH/CYP3A4/CYP17A1/CYP2C19/CYP11B2/CYP2C9 | | 6 |
| GO:0097472 | cyclin-dependent protein kinase activity | 3/150 | 30/17697 | 0.002049 | 0.016192 | 0.0111129 | CDK4/CCND3/CDK7 | | 3 |
| GO:0005164 | tumor necrosis factor receptor binding | 3/150 | 31/17697 | 0.002254 | 0.017572 | 0.012060192 | CASP8/TNF/CD40LG | | 3 |
| GO:0002039 | p53 binding | 4/150 | 66/17697 | 0.002378 | 0.018038 | 0.012380079 | TP53/SIRT1/HDAC1/USP7 | | 4 |
| GO:0042379 | chemokine receptor binding | 4/150 | 66/17697 | 0.002378 | 0.018038 | 0.012380079 | CCL2/CXCL8/STAT3/CCR2 | | 4 |
| GO:0016712 | oxidoreductase activity, acting on paired donors, with incorporation or reduction of molecular oxygen, reduced flavin or flavoprotein as one donor, and incorporation of one atom of oxygen | 3/150 | 32/17697 | 0.002472 | 0.018509 | 0.012703695 | CYP3A4/CYP2C19/CYP2C9 | | 3 |
| GO:0005504 | fatty acid binding | 3/150 | 34/17697 | 0.002946 | 0.021575 | 0.014808072 | PPARG/PPARA/FABP2 | | 3 |
| GO:0016303 | 1-phosphatidylinositol-3-kinase activity | 2/150 | 10/17697 | 0.003071 | 0.021575 | 0.014808072 | PIK3CG/ATM | | 2 |
| GO:0043176 | amine binding | 2/150 | 10/17697 | 0.003071 | 0.021575 | 0.014808072 | HTR2A/HTR1A | | 2 |
| GO:0051378 | serotonin binding | 2/150 | 10/17697 | 0.003071 | 0.021575 | 0.014808072 | HTR2A/HTR1A | | 2 |
| GO:0070513 | death domain binding | 2/150 | 10/17697 | 0.003071 | 0.021575 | 0.014808072 | BCL2/BAX | | 2 |
| GO:0016620 | oxidoreductase activity, acting on the aldehyde or oxo group of donors, NAD or NADP as acceptor | 3/150 | 35/17697 | 0.003202 | 0.022108 | 0.015173294 | AKR1B1/ALDH2/GAPDH | | 3 |
| GO:0001098 | basal transcription machinery binding | 4/150 | 72/17697 | 0.003264 | 0.022108 | 0.015173294 | AR/ESR1/TP53/ERCC5 | | 4 |
| GO:0001099 | basal RNA polymerase II transcription machinery binding | 4/150 | 72/17697 | 0.003264 | 0.022108 | 0.015173294 | AR/ESR1/TP53/ERCC5 | | 4 |
| GO:0001158 | enhancer sequence-specific DNA binding | 5/150 | 119/17697 | 0.003446 | 0.022972 | 0.015766338 | JUN/RELA/TP53/SIRT1/HDAC1 | | 5 |
| GO:0019825 | oxygen binding | 3/150 | 36/17697 | 0.003472 | 0.022972 | 0.015766338 | CYP3A4/CYP17A1/CYP2C19 | | 3 |
| GO:0035004 | phosphatidylinositol 3-kinase activity | 2/150 | 11/17697 | 0.003733 | 0.024138 | 0.016566682 | PIK3CG/ATM | | 2 |
| GO:0043560 | insulin receptor substrate binding | 2/150 | 11/17697 | 0.003733 | 0.024138 | 0.016566682 | JAK2/IGF1R | | 2 |
| GO:0004861 | cyclin-dependent protein serine/threonine kinase inhibitor activity | 2/150 | 12/17697 | 0.004455 | 0.027855 | 0.019118076 | CASP3/CDKN1A | | 2 |
| GO:0008239 | dipeptidyl-peptidase activity | 2/150 | 12/17697 | 0.004455 | 0.027855 | 0.019118076 | DPEP1/ACE | | 2 |
| GO:0042301 | phosphate ion binding | 2/150 | 12/17697 | 0.004455 | 0.027855 | 0.019118076 | RELA/PNP | | 2 |
| GO:0001784 | phosphotyrosine residue binding | 3/150 | 40/17697 | 0.004687 | 0.02899 | 0.019896948 | MAPK1/MAPK3/VAV1 | | 3 |
| GO:0008234 | cysteine-type peptidase activity | 6/150 | 184/17697 | 0.004847 | 0.029654 | 0.020352876 | CASP9/CASP3/CASP8/CASP1/CAPN1/USP7 | | 6 |
| GO:0051879 | Hsp90 protein binding | 3/150 | 41/17697 | 0.005026 | 0.030111 | 0.020666564 | KDR/ERN1/EIF2AK3 | | 3 |
| GO:0016208 | AMP binding | 2/150 | 13/17697 | 0.005236 | 0.030111 | 0.020666564 | FBP1/PYGL | | 2 |
| GO:0031404 | chloride ion binding | 2/150 | 13/17697 | 0.005236 | 0.030111 | 0.020666564 | ACE/SLC22A6 | | 2 |
| GO:0035240 | dopamine binding | 2/150 | 13/17697 | 0.005236 | 0.030111 | 0.020666564 | SLC6A3/DRD2 | | 2 |
| GO:0042910 | xenobiotic transmembrane transporter activity | 2/150 | 13/17697 | 0.005236 | 0.030111 | 0.020666564 | ABCC1/ABCG2 | | 2 |
| GO:0008022 | protein C-terminus binding | 6/150 | 187/17697 | 0.005239 | 0.030111 | 0.020666564 | PPARG/SIRT1/JAK2/KCNK3/CDK7/USP7 | | 6 |
| GO:0005178 | integrin binding | 5/150 | 132/17697 | 0.005349 | 0.030307 | 0.020801156 | ICAM1/VCAM1/IL1B/KDR/CASR | | 5 |
| GO:0043028 | cysteine-type endopeptidase regulator activity involved in apoptotic process | 3/150 | 42/17697 | 0.00538 | 0.030307 | 0.020801156 | BIRC5/DPEP1/CASP1 | | 3 |
| GO:0035326 | enhancer binding | 5/150 | 133/17697 | 0.00552 | 0.030795 | 0.021135623 | JUN/RELA/TP53/SIRT1/HDAC1 | | 5 |
| GO:0001221 | transcription cofactor binding | 3/150 | 43/17697 | 0.005748 | 0.031447 | 0.02158293 | ESR1/RELA/PPARA | | 3 |
| GO:0048020 | CCR chemokine receptor binding | 3/150 | 43/17697 | 0.005748 | 0.031447 | 0.02158293 | CCL2/STAT3/CCR2 | | 3 |
| GO:0036041 | long-chain fatty acid binding | 2/150 | 14/17697 | 0.006074 | 0.032707 | 0.022448385 | PPARG/FABP2 | | 2 |
| GO:0050681 | androgen receptor binding | 3/150 | 44/17697 | 0.00613 | 0.032707 | 0.022448385 | RB1/NCOA1/CDK7 | | 3 |
| GO:0016209 | antioxidant activity | 4/150 | 86/17697 | 0.006151 | 0.032707 | 0.022448385 | PTGS2/SOD1/TPO/GSR | | 4 |
| GO:0005161 | platelet-derived growth factor receptor binding | 2/150 | 15/17697 | 0.00697 | 0.03573 | 0.024523142 | VEGFA/ERN1 | | 2 |
| GO:0016805 | dipeptidase activity | 2/150 | 15/17697 | 0.00697 | 0.03573 | 0.024523142 | DPEP1/ACE | | 2 |
| GO:0017136 | NAD-dependent histone deacetylase activity | 2/150 | 15/17697 | 0.00697 | 0.03573 | 0.024523142 | SIRT1/HDAC1 | | 2 |
| GO:1990404 | protein ADP-ribosylase activity | 2/150 | 15/17697 | 0.00697 | 0.03573 | 0.024523142 | PARP1/PARP2 | | 2 |
| GO:0016763 | transferase activity, transferring pentosyl groups | 3/150 | 47/17697 | 0.007368 | 0.037434 | 0.025692653 | PARP1/PARP2/PNP | | 3 |
| GO:0004708 | MAP kinase kinase activity | 2/150 | 16/17697 | 0.007922 | 0.0382 | 0.026218127 | MAPK1/MAPK3 | | 2 |
| GO:0005149 | interleukin-1 receptor binding | 2/150 | 16/17697 | 0.007922 | 0.0382 | 0.026218127 | IL1B/TLR9 | | 2 |
| GO:0008392 | arachidonic acid epoxygenase activity | 2/150 | 16/17697 | 0.007922 | 0.0382 | 0.026218127 | CYP2C19/CYP2C9 | | 2 |
| GO:0016641 | oxidoreductase activity, acting on the CH-NH2 group of donors, oxygen as acceptor | 2/150 | 16/17697 | 0.007922 | 0.0382 | 0.026218127 | VCAM1/MAOA | | 2 |
| GO:0034979 | NAD-dependent protein deacetylase activity | 2/150 | 16/17697 | 0.007922 | 0.0382 | 0.026218127 | SIRT1/HDAC1 | | 2 |
| GO:0052742 | phosphatidylinositol kinase activity | 2/150 | 16/17697 | 0.007922 | 0.0382 | 0.026218127 | PIK3CG/ATM | | 2 |
| GO:0070888 | E-box binding | 3/150 | 50/17697 | 0.008744 | 0.041643 | 0.028580891 | PPARG/MYC/HDAC1 | | 3 |
| GO:0005123 | death receptor binding | 2/150 | 17/17697 | 0.008929 | 0.041643 | 0.028580891 | CASP3/CASP8 | | 2 |
| GO:0008391 | arachidonic acid monooxygenase activity | 2/150 | 17/17697 | 0.008929 | 0.041643 | 0.028580891 | CYP2C19/CYP2C9 | | 2 |
| GO:0046965 | retinoid X receptor binding | 2/150 | 17/17697 | 0.008929 | 0.041643 | 0.028580891 | PPARG/NCOA1 | | 2 |
| GO:0016757 | transferase activity, transferring glycosyl groups | 7/150 | 280/17697 | 0.009966 | 0.045838 | 0.031460263 | HAS2/PARP1/GYS1/PYGM/PYGL/PARP2/PNP | | 7 |
| GO:0008353 | RNA polymerase II CTD heptapeptide repeat kinase activity | 2/150 | 18/17697 | 0.009989 | 0.045838 | 0.031460263 | MAPK1/CDK7 | | 2 |
| GO:0061134 | peptidase regulator activity | 6/150 | 219/17697 | 0.010992 | 0.048973 | 0.033612169 | APP/BIRC5/DPEP1/SERPINE1/CASP1  /GAPDH | | 6 |
| GO:0033218 | amide binding | 8/150 | 356/17697 | 0.011054 | 0.048973 | 0.033612169 | ADRB2/NFKBIA/PPARG/RXRA/TYMS/  IGF1R/MME/TLR4 | | 8 |
| GO:0042562 | hormone binding | 4/150 | 102/17697 | 0.011097 | 0.048973 | 0.033612169 | AR/SHBG/TTR/IGF1R | | 4 |
| GO:0051087 | chaperone binding | 4/150 | 102/17697 | 0.011097 | 0.048973 | 0.033612169 | BAX/TP53/BIRC5/SOD1 | | 4 |
| GO:0031690 | adrenergic receptor binding | 2/150 | 19/17697 | 0.011103 | 0.048973 | 0.033612169 | ADRA2A/NEDD4 | | 2 |
| GO:0001047 | core promoter binding | 3/150 | 55/17697 | 0.011351 | 0.049302 | 0.033838079 | TP53/MYC/HDAC1 | | 3 |
| GO:0042165 | neurotransmitter binding | 3/150 | 55/17697 | 0.011351 | 0.049302 | 0.033838079 | HTR2A/CRP/HTR1A | | 3 |

| **Table S4** KEGG Analysis | | | | | | | | | |
| --- | --- | --- | --- | --- | --- | --- | --- | --- | --- |
| ID | Description | GeneRatio | BgRatio | P value | P.adjust | Qvalue | GeneID | Count | |
| hsa05417 | Lipid and atherosclerosis | 35/137 | 215/8105 | 2.07E-25 | 5.52E-23 | 2.02E-23 | BCL2/BAX/CASP9/JUN/CASP3/CASP8/RELA/MAPK1/  TNF/IL6/TP53/NFKBIA/PPARG/ICAM1/CD40LG/NOS3/  MAPK8/SELE/VCAM1/MMP3/RXRA/IL1B/CCL2/CXCL8  /JAK2/NLRP3/CASP1/STAT3/MAPK3/ERN1/HSP90AA1/  VAV1/CYP2C9/EIF2AK3/TLR4 | | 35 |
| hsa04933 | AGE-RAGE signaling pathway in diabetic complications | 26/137 | 100/8105 | 1.82E-24 | 2.42E-22 | 8.88E-23 | BCL2/BAX/JUN/CASP3/TGFB1/RELA/VEGFA/MAPK1/  CDK4/TNF/IL6/ICAM1/NOS3/MAPK8/SELE/VCAM1  /IL1B/CCL2/CXCL8/THBD/SERPINE1/COL1A1/JAK2/  STAT3/MAPK3/AGTR1 | | 26 |
| hsa05161 | Hepatitis B | 25/137 | 162/8105 | 1.25E-17 | 1.11E-15 | 4.08E-16 | BCL2/BAX/CASP9/JUN/CASP3/CASP8/TGFB1/RELA/  CDKN1A/MAPK1/RB1/TNF/IL6/TP53/NFKBIA/BIRC5/  MAPK8/MYC/CXCL8/E2F1/JAK2/STAT3/MAPK3/  SLC10A1/TLR4 | | 25 |
| hsa05167 | Kaposi sarcoma-associated herpesvirus infection | 25/137 | 193/8105 | 9.07E-16 | 6.05E-14 | 2.22E-14 | PTGS2/PIK3CG/BAX/CASP9/JUN/CASP3/CASP8/RELA/  VEGFA/CDKN1A/MAPK1/RB1/CDK4/IL6/TP53/NFKBIA  /ICAM1/MAPK8/MYC/CXCL8/E2F1/JAK2/STAT3/MAPK3/  MTOR | | 25 |
| hsa05144 | Malaria | 15/137 | 50/8105 | 1.64E-15 | 8.77E-14 | 3.22E-14 | TGFB1/IL10/TNF/IL6/ICAM1/IFNG/CD40LG/SELE/VCAM1  /IL1B/CCL2/CXCL8/PECAM1/TLR9/TLR4 | | 15 |
| hsa05142 | Chagas disease | 19/137 | 102/8105 | 3.71E-15 | 1.65E-13 | 6.05E-14 | JUN/CASP8/TGFB1/RELA/MAPK1/IL10/TNF/IL6/NFKBIA  /IFNG/MAPK8/IL1B/CCL2/CXCL8/SERPINE1/ACE/  MAPK3/TLR9/TLR4 | | 19 |
| hsa04657 | IL-17 signaling pathway | 18/137 | 94/8105 | 1.24E-14 | 4.74E-13 | 1.74E-13 | PTGS2/JUN/CASP3/CASP8/RELA/MAPK1/TNF/IL6  /NFKBIA/IFNG/IL4/MAPK8/MMP3/IL1B/CCL2/CXCL8  /MAPK3/HSP90AA1 | | 18 |
| hsa04210 | Apoptosis | 20/137 | 136/8105 | 7.59E-14 | 2.53E-12 | 9.29E-13 | BCL2/BAX/CASP9/JUN/CASP3/CASP8/RELA/MAPK1/TNF  /TP53/NFKBIA/BIRC5/MAPK8/PARP1/MAPK3/ERN1/CAPN1  /PARP2/ATM/EIF2AK3 | | 20 |
| hsa05169 | Epstein-Barr virus infection | 23/137 | 202/8105 | 2.43E-13 | 7.20E-12 | 2.64E-12 | BCL2/BAX/CASP9/JUN/CASP3/CASP8/RELA/CDKN1A/RB1  /CDK4/TNF/IL6/TP53/NFKBIA/ICAM1/MAPK8/MYC/E2F1/  HDAC1/STAT3/CCND3/NEDD4/USP7 | | 23 |
| hsa05145 | Toxoplasmosis | 18/137 | 112/8105 | 3.03E-13 | 8.10E-12 | 2.97E-12 | PIK3CG/BCL2/CASP9/CASP3/CASP8/TGFB1/RELA/MAPK1  /IL10/TNF/NFKBIA/IFNG/CD40LG/MAPK8/JAK2/STAT3/  MAPK3/TLR4 | | 18 |
| hsa05164 | Influenza A | 21/137 | 172/8105 | 7.44E-13 | 1.81E-11 | 6.62E-12 | BAX/CASP9/CASP3/CASP8/RELA/MAPK1/CDK4/TNF/IL6/  NFKBIA/ICAM1/IFNG/IL1B/CCL2/CXCL8/JAK2/NLRP3/CASP1  /MAPK3/CCND3/TLR4 | | 21 |
| hsa05160 | Hepatitis C | 20/137 | 157/8105 | 1.23E-12 | 2.67E-11 | 9.78E-12 | BAX/CASP9/CASP3/CASP8/RELA/CDKN1A/MAPK1/RB1/CDK4  /TNF/TP53/NFKBIA/IFNG/RXRA/MYC/PPARA/E2F1/STAT3/  MAPK3/EIF2AK3 | | 20 |
| hsa05418 | Fluid shear stress and atherosclerosis | 19/137 | 139/8105 | 1.30E-12 | 2.67E-11 | 9.78E-12 | BCL2/JUN/RELA/VEGFA/TNF/TP53/ICAM1/IFNG/NOS3/  MAPK8/SELE/VCAM1/IL1B/CCL2/PLAT/THBD/PECAM1/KDR  /HSP90AA1 | | 19 |
| hsa05212 | Pancreatic cancer | 15/137 | 76/8105 | 1.43E-12 | 2.73E-11 | 1.00E-11 | BAX/CASP9/TGFB1/RELA/VEGFA/CDKN1A/MAPK1/RB1/  CDK4/TP53/MAPK8/E2F1/STAT3/MAPK3/MTOR | | 15 |
| hsa05163 | Human cytomegalovirus infection | 23/137 | 225/8105 | 2.42E-12 | 4.31E-11 | 1.58E-11 | PTGS2/BAX/CASP9/CASP3/CASP8/RELA/VEGFA/  CDKN1A/MAPK1/RB1/CDK4/TNF/IL6/TP53/NFKBIA/MYC  /IL1B/CCL2/CXCL8/E2F1/STAT3/MAPK3/MTOR | | 23 |
| hsa04668 | TNF signaling pathway | 17/137 | 112/8105 | 3.80E-12 | 6.33E-11 | 2.32E-11 | PTGS2/JUN/CASP3/CASP8/RELA/MAPK1/TNF/IL6/NFKBIA  /ICAM1/MAPK8/SELE/VCAM1/MMP3/IL1B/CCL2/MAPK3 | | 17 |
| hsa05215 | Prostate cancer | 16/137 | 97/8105 | 4.54E-12 | 7.14E-11 | 2.62E-11 | BCL2/CASP9/AR/RELA/CDKN1A/MAPK1/RB1/TP53/  NFKBIA/MMP3  /PLAT/E2F1/MAPK3/HSP90AA1/MTOR/IGF1R | | 16 |
| hsa05162 | Measles | 18/137 | 139/8105 | 1.35E-11 | 2.01E-10 | 7.37E-11 | BCL2/BAX/CASP9/JUN/CASP3/CASP8/RELA/CDK4/  IL6/TP53/NFKBIA/MAPK8/IL1B/STAT3/CCND3/TLR9/  EIF2AK3/TLR4 | | 18 |
| hsa04659 | Th17 cell differentiation | 16/137 | 107/8105 | 2.15E-11 | 2.99E-10 | 1.10E-10 | JUN/TGFB1/RELA/MAPK1/IL6/NFKBIA/IFNG/IL4/MAPK8/  RXRA/IL1B/JAK2/STAT3/MAPK3/HSP90AA1/MTOR | | 16 |
| hsa05133 | Pertussis | 14/137 | 76/8105 | 2.24E-11 | 2.99E-10 | 1.10E-10 | JUN/CASP3/RELA/MAPK1/IL10/TNF/IL6/MAPK8/IL1B/  CXCL8/NLRP3/CASP1/MAPK3/TLR4 | | 14 |
| hsa05140 | Leishmaniasis | 14/137 | 77/8105 | 2.70E-11 | 3.43E-10 | 1.26E-10 | PTGS2/JUN/TGFB1/RELA/MAPK1/IL10/TNF/NFKBIA  /IFNG/IL4/IL1B/JAK2/MAPK3/TLR4 | | 14 |
| hsa04066 | HIF-1 signaling pathway | 16/137 | 109/8105 | 2.88E-11 | 3.50E-10 | 1.28E-10 | BCL2/RELA/VEGFA/CDKN1A/MAPK1/IL6/IFNG/NOS3/  SERPINE1/STAT3/MAPK3/GAPDH/LDHA/MTOR/IGF1R/TLR4 | | 16 |
| hsa04218 | Cellular senescence | 18/137 | 156/8105 | 9.68E-11 | 1.12E-09 | 4.12E-10 | TGFB1/RELA/CDKN1A/MAPK1/RB1/CDK4/IL6/TP53/  MYC/CXCL8/SERPINE1/E2F1/SIRT1/MAPK3/CCND3/CAPN1/  MTOR/ATM | | 18 |
| hsa05210 | Colorectal cancer | 14/137 | 86/8105 | 1.28E-10 | 1.42E-09 | 5.19E-10 | BCL2/BAX/CASP9/JUN/CASP3/TGFB1/CDKN1A/MAPK1/  TP53/BIRC5/MAPK8/MYC/MAPK3/MTOR | | 14 |
| hsa04217 | Necroptosis | 18/137 | 159/8105 | 1.33E-10 | 1.42E-09 | 5.19E-10 | BCL2/BAX/CASP8/TNF/IFNG/MAPK8/IL1B/PARP1/  PLA2G4A/JAK2/NLRP3/CASP1/STAT3/HSP90AA1/CAPN1  /PYGM/PYGL/TLR4 | | 18 |
| hsa05132 | Salmonella infection | 22/137 | 249/8105 | 1.38E-10 | 1.42E-09 | 5.19E-10 | PIK3CG/BCL2/BAX/JUN/CASP3/CASP8/RELA/MAPK1/TNF/  IL6/NFKBIA/MAPK8/MYC/IL1B/CXCL8/NLRP3/CASP1/  MAPK3/GAPDH/HSP90AA1/TLR9/TLR4 | | 22 |
| hsa04621 | NOD-like receptor signaling pathway | 19/137 | 181/8105 | 1.48E-10 | 1.46E-09 | 5.36E-10 | BCL2/JUN/CASP8/RELA/MAPK1/TNF/IL6/NFKBIA/MAPK8  /IL1B/CCL2/CXCL8/NLRP3/CASP1/MAPK3/HSP90AA1/P2RX7  /CASR/TLR4 | | 19 |
| hsa05220 | Chronic myeloid leukemia | 13/137 | 76/8105 | 3.19E-10 | 2.90E-09 | 1.06E-09 | BAX/TGFB1/RELA/CDKN1A/MAPK1/RB1/CDK4/TP53  /NFKBIA/MYC/E2F1/HDAC1/MAPK3 | | 13 |
| hsa05143 | African trypanosomiasis | 10/137 | 37/8105 | 3.23E-10 | 2.90E-09 | 1.06E-09 | IL10/TNF/IL6/ICAM1/IFNG/SELE/VCAM1/IL1B/TLR9/F2RL1 | | 10 |
| hsa05222 | Small cell lung cancer | 14/137 | 92/8105 | 3.26E-10 | 2.90E-09 | 1.06E-09 | PTGS2/BCL2/BAX/CASP9/CASP3/RELA/CDKN1A/RB1/CDK4  /TP53/NFKBIA/RXRA/MYC/E2F1 | | 14 |
| hsa01522 | Endocrine resistance | 14/137 | 98/8105 | 7.75E-10 | 6.67E-09 | 2.45E-09 | BCL2/BAX/JUN/ESR1/CDKN1A/MAPK1/RB1/CDK4/TP53/  MAPK8/E2F1/MAPK3/MTOR/IGF1R | | 14 |
| hsa05135 | Yersinia infection | 16/137 | 137/8105 | 9.59E-10 | 7.95E-09 | 2.91E-09 | JUN/RELA/MAPK1/IL10/TNF/IL6/NFKBIA/MAPK8/IL1B/  CCL2/CXCL8/NLRP3/CASP1/MAPK3/VAV1/TLR4 | | 16 |
| hsa05219 | Bladder cancer | 10/137 | 41/8105 | 9.82E-10 | 7.95E-09 | 2.91E-09 | VEGFA/CDKN1A/MAPK1/RB1/CDK4/TP53/MYC/CXCL8/  E2F1/MAPK3 | | 10 |
| hsa05152 | Tuberculosis | 18/137 | 180/8105 | 1.04E-09 | 8.18E-09 | 3.00E-09 | BCL2/BAX/CASP9/CASP3/CASP8/TGFB1/RELA/MAPK1/  IL10/TNF/IL6/IFNG/MAPK8/IL1B/JAK2/MAPK3/  TLR9/TLR4 | | 18 |
| hsa04625 | C-type lectin receptor signaling pathway | 14/137 | 104/8105 | 1.73E-09 | 1.32E-08 | 4.85E-09 | PTGS2/JUN/CASP8/RELA/MAPK1/IL10/TNF/IL6/NFKBIA  /MAPK8/IL1B/NLRP3/CASP1/MAPK3 | | 14 |
| hsa05134 | Legionellosis | 11/137 | 57/8105 | 2.04E-09 | 1.52E-08 | 5.56E-09 | CASP9/CASP3/CASP8/RELA/TNF/IL6/NFKBIA/IL1B/CXCL8/  CASP1/TLR4 | | 11 |
| hsa04115 | p53 signaling pathway | 12/137 | 73/8105 | 2.56E-09 | 1.84E-08 | 6.76E-09 | BCL2/BAX/CASP9/CASP3/CASP8/CDKN1A/CDK4/  TP53/SERPINE1/MDM4/CCND3/ATM | | 12 |
| hsa05166 | Human T-cell leukemia virus 1 infection | 19/137 | 219/8105 | 3.84E-09 | 2.70E-08 | 9.89E-09 | BAX/JUN/TGFB1/RELA/CDKN1A/MAPK1/RB1/  CDK4/TNF/IL6/TP53/NFKBIA/ICAM1/MAPK8/MYC/  E2F1/MAPK3/CCND3/ATM | | 19 |
| hsa04151 | PI3K-Akt signaling pathway | 24/137 | 354/8105 | 4.22E-09 | 2.89E-08 | 1.06E-08 | PIK3CG/BCL2/CASP9/RELA/VEGFA/CDKN1A/  MAPK1/CDK4/IL6/TP53/IL4/NOS3/RXRA/MYC/COL1A1  /KDR/JAK2/GYS1/MAPK3/HSP90AA1/CCND3/MTOR/  IGF1R/TLR4 | | 24 |
| hsa05130 | Pathogenic Escherichia coli infection | 18/137 | 197/8105 | 4.49E-09 | 3.00E-08 | 1.10E-08 | BAX/CASP9/JUN/CASP3/CASP8/RELA/MAPK1/  TNF/IL6/NFKBIA/MAPK8/IL1B/CXCL8/NLRP3/CASP1  /MAPK3/GAPDH/TLR4 | | 18 |
| hsa05205 | Proteoglycans in cancer | 18/137 | 205/8105 | 8.47E-09 | 5.52E-08 | 2.02E-08 | CASP3/TGFB1/ESR1/VEGFA/CDKN1A/MAPK1/TNF/  TP53/MYC/COL1A1/KDR/STAT3/MAPK3/VAV1/MTOR  /WNT3A/IGF1R/TLR4 | | 18 |
| hsa05321 | Inflammatory bowel disease | 11/137 | 65/8105 | 8.84E-09 | 5.62E-08 | 2.06E-08 | JUN/TGFB1/RELA/IL10/TNF/IL6/IFNG/IL4/IL1B/  STAT3/TLR4 | | 11 |
| hsa04064 | NF-kappa B signaling pathway | 13/137 | 104/8105 | 1.71E-08 | 1.01E-07 | 3.72E-08 | PTGS2/BCL2/RELA/TNF/NFKBIA/ICAM1/  CD40LG/VCAM1/IL1B/CXCL8/PARP1/ATM/TLR4 | | 13 |
| hsa04620 | Toll-like receptor signaling pathway | 13/137 | 104/8105 | 1.71E-08 | 1.01E-07 | 3.72E-08 | JUN/CASP8/RELA/MAPK1/TNF/IL6/NFKBIA/  MAPK8/IL1B/CXCL8/MAPK3/TLR9/TLR4 | | 13 |
| hsa04660 | T cell receptor signaling pathway | 13/137 | 104/8105 | 1.71E-08 | 1.01E-07 | 3.72E-08 | JUN/RELA/MAPK1/IL10/CDK4/TNF/NFKBIA/  IFNG/IL4/CD40LG/MAPK8/MAPK3/VAV1 | | 13 |
| hsa05224 | Breast cancer | 15/137 | 147/8105 | 2.15E-08 | 1.25E-07 | 4.58E-08 | BAX/JUN/ESR1/CDKN1A/MAPK1/RB1/CDK4/  TP53/NCOA1/MYC  /E2F1/MAPK3/MTOR/WNT3A/IGF1R | | 15 |
| hsa05223 | Non-small cell lung cancer | 11/137 | 72/8105 | 2.70E-08 | 1.51E-07 | 5.54E-08 | BAX/CASP9/CDKN1A/MAPK1/RB1/CDK4/TP53/  RXRA/E2F1/STAT3/MAPK3 | | 11 |
| hsa04931 | Insulin resistance | 13/137 | 108/8105 | 2.72E-08 | 1.51E-07 | 5.54E-08 | RELA/TNF/IL6/NFKBIA/SLC2A4/NOS3/MAPK8/  PPARA/GYS1/STAT3/PYGM/PYGL/MTOR | | 13 |
| hsa04932 | Non-alcoholic fatty liver disease | 15/137 | 150/8105 | 2.83E-08 | 1.54E-07 | 5.66E-08 | BAX/JUN/CASP3/CASP8/TGFB1/RELA/TNF/IL6/  MAPK8/RXRA/IL1B/CXCL8/PPARA/ERN1/EIF2AK3 | | 15 |
| hsa01523 | Antifolate resistance | 8/137 | 31/8105 | 3.09E-08 | 1.64E-07 | 6.01E-08 | RELA/TNF/IL6/IL1B/ABCC4/ABCC1/ABCG2/TYMS | | 8 |
| hsa01524 | Platinum drug resistance | 11/137 | 73/8105 | 3.13E-08 | 1.64E-07 | 6.01E-08 | BCL2/BAX/CASP9/CASP3/CASP8/CDKN1A/  MAPK1/TP53/BIRC5/MAPK3/ATM | | 11 |
| hsa05323 | Rheumatoid arthritis | 12/137 | 93/8105 | 4.34E-08 | 2.23E-07 | 8.18E-08 | JUN/TGFB1/VEGFA/TNF/IL6/ICAM1/IFNG/  MMP3/IL1B/CCL2/CXCL8/TLR4 | | 12 |
| hsa05415 | Diabetic cardiomyopathy | 17/137 | 203/8105 | 4.60E-08 | 2.32E-07 | 8.50E-08 | TGFB1/RELA/SLC2A4/NOS3/MAPK8/COL1A1/  PARP1/PPARA/ACE/GYS1/GAPDH/AGTR1/ATP2A1  /REN/MTOR/GSR | | 17 |
| hsa05171 | Coronavirus disease - COVID-19 | 18/137 | 232/8105 | 5.86E-08 | 2.90E-07 | 1.06E-07 | JUN/RELA/MAPK1/TNF/IL6/NFKBIA/MAPK8/MMP3  /IL1B/CCL2/CXCL8/ACE/NLRP3/CASP1/STAT3/MAPK3  /AGTR1/TLR4 | | 18 |
| hsa01521 | EGFR tyrosine kinase inhibitor resistance | 11/137 | 79/8105 | 7.30E-08 | 3.54E-07 | 1.30E-07 | BCL2/BAX/VEGFA/MAPK1/IL6/KDR/JAK2/STAT3/MAPK3  /MTOR/IGF1R | | 11 |
| hsa05216 | Thyroid cancer | 8/137 | 37/8105 | 1.39E-07 | 6.61E-07 | 2.42E-07 | BAX/CDKN1A/MAPK1/TP53/PPARG/RXRA/MYC/MAPK3 | | 8 |
| hsa05131 | Shigellosis | 18/137 | 246/8105 | 1.43E-07 | 6.72E-07 | 2.46E-07 | BCL2/BAX/JUN/RELA/MAPK1/TNF/TP53/NFKBIA/MAPK8/  IL1B/CXCL8/NLRP3/CASP1/MAPK3/CAPN1/MTOR/  ATM/TLR4 | | 18 |
| hsa04920 | Adipocytokine signaling pathway | 10/137 | 69/8105 | 1.99E-07 | 9.18E-07 | 3.36E-07 | RELA/TNF/NFKBIA/SLC2A4/MAPK8/RXRA/PPARA/  JAK2/STAT3/MTOR | | 10 |
| hsa05235 | PD-L1 expression and PD-1 checkpoint pathway in cancer | 11/137 | 89/8105 | 2.55E-07 | 1.16E-06 | 4.24E-07 | JUN/RELA/MAPK1/NFKBIA/IFNG/JAK2/STAT3/  MAPK3/TLR9/MTOR/TLR4 | | 11 |
| hsa04068 | FoxO signaling pathway | 13/137 | 131/8105 | 2.75E-07 | 1.22E-06 | 4.49E-07 | TGFB1/CDKN1A/MAPK1/IL10/IL6/SLC2A4/  MAPK8/SIRT1/STAT3/MAPK3/ATM/IGF1R/USP7 | | 13 |
| hsa05203 | Viral carcinogenesis | 16/137 | 204/8105 | 2.92E-07 | 1.28E-06 | 4.68E-07 | BAX/JUN/CASP3/CASP8/RELA/CDKN1A/MAPK1  /RB1/CDK4/TP53/NFKBIA/HDAC1/STAT3/MAPK3  /CCND3/USP7 | | 16 |
| hsa05214 | Glioma | 10/137 | 75/8105 | 4.46E-07 | 1.92E-06 | 7.04E-07 | BAX/CDKN1A/MAPK1/RB1/CDK4/TP53/E2F1/MAPK3  /MTOR/IGF1R | | 10 |
| hsa05165 | Human papillomavirus infection | 20/137 | 331/8105 | 6.22E-07 | 2.64E-06 | 9.67E-07 | PTGS2/BAX/CASP3/CASP8/RELA/VEGFA/CDKN1A/  MAPK1/RB1/CDK4/TNF/TP53/COL1A1/E2F1/HDAC1/  MAPK3/CCND3/MTOR/ATM/WNT3A | | 20 |
| hsa04215 | Apoptosis - multiple species | 7/137 | 32/8105 | 8.00E-07 | 3.34E-06 | 1.22E-06 | BCL2/BAX/CASP9/CASP3/CASP8/BIRC5/MAPK8 | | 7 |
| hsa04919 | Thyroid hormone signaling pathway | 12/137 | 121/8105 | 8.16E-07 | 3.35E-06 | 1.23E-06 | NCOA2/CASP9/ESR1/MAPK1/TP53/NCOA1/RXRA/  MYC/HDAC1/MAPK3/ATP2A1/MTOR | | 12 |
| hsa05206 | MicroRNAs in cancer | 19/137 | 310/8105 | 9.87E-07 | 3.99E-06 | 1.46E-06 | PTGS2/BCL2/CASP3/VEGFA/CDKN1A/MAPK1/TP53  /MYC/E2F1/SIRT1/HDAC1/ABCC1/STAT3/MAPK3/MDM4  /BCL2L2/MTOR/ATM/WNT3A | | 19 |
| hsa05146 | Amoebiasis | 11/137 | 102/8105 | 1.03E-06 | 4.12E-06 | 1.51E-06 | CASP3/TGFB1/RELA/IL10/TNF/IL6/IFNG/IL1B/CXCL8/  COL1A1/TLR4 | | 11 |
| hsa05226 | Gastric cancer | 13/137 | 149/8105 | 1.22E-06 | 4.80E-06 | 1.76E-06 | BCL2/BAX/TGFB1/CDKN1A/MAPK1/RB1/TP53/RXRA  /MYC/E2F1/MAPK3/MTOR/WNT3A | | 13 |
| hsa04917 | Prolactin signaling pathway | 9/137 | 70/8105 | 2.35E-06 | 9.09E-06 | 3.33E-06 | ESR1/RELA/MAPK1/MAPK8/CYP17A1/GCK/JAK2/  STAT3/MAPK3 | | 9 |
| hsa05170 | Human immunodeficiency virus 1 infection | 15/137 | 212/8105 | 2.59E-06 | 9.89E-06 | 3.63E-06 | BCL2/BAX/CASP9/JUN/CASP3/CASP8/RELA/MAPK1  /TNF/NFKBIA  /MAPK8/MAPK3/MTOR/ATM/TLR4 | | 15 |
| hsa05218 | Melanoma | 9/137 | 72/8105 | 2.99E-06 | 1.12E-05 | 4.12E-06 | BAX/CDKN1A/MAPK1/RB1/CDK4/TP53/E2F1/  MAPK3/IGF1R | | 9 |
| hsa05010 | Alzheimer disease | 20/137 | 369/8105 | 3.39E-06 | 1.25E-05 | 4.59E-06 | PTGS2/CASP9/CASP3/CASP8/RELA/MAPK1/TNF/IL6/  APP/MAPK8/IL1B/MAPK3/ERN1/GAPDH/ATP2A1/CAPN1  /MTOR/WNT3A/MME  /EIF2AK3 | | 20 |
| hsa04726 | Serotonergic synapse | 11/137 | 115/8105 | 3.42E-06 | 1.25E-05 | 4.59E-06 | PTGS2/HTR2A/CASP3/MAPK1/APP/MAOA/CYP2C19/  PLA2G4A/MAPK3/HTR1A/CYP2C9 | | 11 |
| hsa05202 | Transcriptional misregulation in cancer | 14/137 | 192/8105 | 4.02E-06 | 1.45E-05 | 5.31E-06 | BAX/RELA/CDKN1A/IL6/TP53/PPARG/MMP3/RXRA/  MYC/CXCL8/PLAT/HDAC1/ATM/IGF1R | | 14 |
| hsa05225 | Hepatocellular carcinoma | 13/137 | 168/8105 | 4.71E-06 | 1.68E-05 | 6.15E-06 | BAX/TGFB1/CDKN1A/MAPK1/RB1/CDK4/TP53/MYC  /E2F1/MAPK3/MTOR/WNT3A/IGF1R | | 13 |
| hsa04370 | VEGF signaling pathway | 8/137 | 59/8105 | 5.83E-06 | 2.05E-05 | 7.50E-06 | PTGS2/CASP9/VEGFA/MAPK1/NOS3/PLA2G4A/  KDR/MAPK3 | | 8 |
| hsa04110 | Cell cycle | 11/137 | 124/8105 | 7.15E-06 | 2.48E-05 | 9.09E-06 | TGFB1/CDKN1A/RB1/CDK4/TP53/MYC/E2F1/  HDAC1/CCND3/CDK7/ATM | | 11 |
| hsa04380 | Osteoclast differentiation | 11/137 | 128/8105 | 9.71E-06 | 3.33E-05 | 1.22E-05 | JUN/TGFB1/RELA/MAPK1/TNF/NFKBIA/PPARG/  IFNG/MAPK8/IL1B/MAPK3 | | 11 |
| hsa04930 | Type II diabetes mellitus | 7/137 | 46/8105 | 1.04E-05 | 3.53E-05 | 1.29E-05 | MAPK1/TNF/SLC2A4/MAPK8/GCK/MAPK3/MTOR | | 7 |
| hsa05022 | Pathways of neurodegeneration - multiple diseases | 22/137 | 475/8105 | 1.34E-05 | 4.46E-05 | 1.64E-05 | PTGS2/BCL2/BAX/CASP9/CASP3/CASP8/RELA/  MAPK1/TNF/IL6/APP/MAPK8/SOD1/IL1B/SLC6A3/  MAPK3/ERN1/ATP2A1/CAPN1/MTOR/WNT3A/EIF2AK3 | | 22 |
| hsa04024 | cAMP signaling pathway | 14/137 | 216/8105 | 1.56E-05 | 5.15E-05 | 1.89E-05 | ADRB2/JUN/RELA/MAPK1/NFKBIA/MAPK8/PPARA  /ABCC4/MAPK3/DRD2/ATP2A1/VAV1/RAPGEF4/HTR1A | | 14 |
| hsa05230 | Central carbon metabolism in cancer | 8/137 | 70/8105 | 2.12E-05 | 6.91E-05 | 2.53E-05 | MAPK1/TP53/MYC/G6PD/GCK/MAPK3/LDHA/MTOR | | 8 |
| hsa04658 | Th1 and Th2 cell differentiation | 9/137 | 92/8105 | 2.29E-05 | 7.38E-05 | 2.70E-05 | JUN/RELA/MAPK1/NFKBIA/IFNG/IL4/MAPK8  /JAK2/MAPK3 | | 9 |
| hsa04071 | Sphingolipid signaling pathway | 10/137 | 119/8105 | 3.05E-05 | 9.68E-05 | 3.55E-05 | BCL2/BAX/RELA/MAPK1/TNF/TP53/NOS3/  MAPK8/ABCC1/MAPK3 | | 10 |
| hsa04614 | Renin-angiotensin system | 5/137 | 23/8105 | 3.38E-05 | 0.00010611 | 3.89E-05 | PREP/ACE/AGTR1/REN/MME | | 5 |
| hsa05213 | Endometrial cancer | 7/137 | 58/8105 | 4.95E-05 | 0.00015383 | 5.64E-05 | BAX/CASP9/CDKN1A/MAPK1/TP53/MYC/MAPK3 | | 7 |
| hsa04934 | Cushing syndrome | 11/137 | 155/8105 | 5.85E-05 | 0.00017968 | 6.59E-05 | CDKN1A/MAPK1/RB1/CDK4/E2F1/CYP17A1/HSD3B2/  MAPK3/AGTR1/KCNK3/WNT3A | | 11 |
| hsa04926 | Relaxin signaling pathway | 10/137 | 129/8105 | 6.10E-05 | 0.00018505 | 6.78E-05 | JUN/TGFB1/RELA/VEGFA/MAPK1/NFKBIA/NOS3/  MAPK8/COL1A1/MAPK3 | | 10 |
| hsa04630 | JAK-STAT signaling pathway | 11/137 | 162/8105 | 8.75E-05 | 0.0002624 | 9.62E-05 | BCL2/CDKN1A/IL10/IL6/IFNG/IL4/MYC/JAK2/STAT3/  CCND3/MTOR | | 11 |
| hsa04910 | Insulin signaling pathway | 10/137 | 137/8105 | 0.000101 | 0.00030088 | 0.000110318 | MAPK1/SLC2A4/MAPK8/GCK/GYS1/FBP1/MAPK3/  PYGM/PYGL/MTOR | | 10 |
| hsa04010 | MAPK signaling pathway | 15/137 | 294/8105 | 0.000124 | 0.00036406 | 0.000133482 | JUN/CASP3/TGFB1/RELA/VEGFA/MAPK1/TNF/TP53/  MAPK8/MYC/IL1B/PLA2G4A/KDR/MAPK3/IGF1R | | 15 |
| hsa00010 | Glycolysis / Gluconeogenesis | 7/137 | 67/8105 | 0.000126 | 0.00036654 | 0.000134391 | ALDH2/GCK/FBP1/GAPDH/LDHA/ADH1B/ADH7 | | 7 |
| hsa04664 | Fc epsilon RI signaling pathway | 7/137 | 68/8105 | 0.000139 | 0.00039858 | 0.000146137 | MAPK1/TNF/IL4/MAPK8/PLA2G4A/MAPK3/VAV1 | | 7 |
| hsa04722 | Neurotrophin signaling pathway | 9/137 | 119/8105 | 0.000174 | 0.00049337 | 0.000180891 | BCL2/BAX/JUN/RELA/MAPK1/TP53/NFKBIA/MAPK8/  MAPK3 | | 9 |
| hsa04062 | Chemokine signaling pathway | 11/137 | 192/8105 | 0.00039 | 0.00109479 | 0.000401402 | PIK3CG/RELA/MAPK1/NFKBIA/CCL2/CXCL8/JAK2/  STAT3/CCR2/MAPK3/VAV1 | | 11 |
| hsa05330 | Allograft rejection | 5/137 | 38/8105 | 0.000411 | 0.00114341 | 0.000419229 | IL10/TNF/IFNG/IL4/CD40LG | | 5 |
| hsa04922 | Glucagon signaling pathway | 8/137 | 107/8105 | 0.000434 | 0.00119418 | 0.000437842 | PPARA/SIRT1/GCK/GYS1/FBP1/PYGM/PYGL/LDHA | | 8 |
| hsa04915 | Estrogen signaling pathway | 9/137 | 138/8105 | 0.000525 | 0.00143077 | 0.000524588 | NCOA2/BCL2/JUN/ESR1/MAPK1/NCOA1/NOS3/  MAPK3/HSP90AA1 | | 9 |
| hsa04012 | ErbB signaling pathway | 7/137 | 85/8105 | 0.000557 | 0.00150238 | 0.000550842 | JUN/CDKN1A/MAPK1/MAPK8/MYC/MAPK3/MTOR | | 7 |
| hsa04510 | Focal adhesion | 11/137 | 201/8105 | 0.000574 | 0.00153332 | 0.000562187 | BCL2/JUN/VEGFA/MAPK1/MAPK8/COL1A1/KDR/  MAPK3/CCND3/VAV1/IGF1R | | 11 |
| hsa04211 | Longevity regulating pathway | 7/137 | 89/8105 | 0.000735 | 0.00194392 | 0.000712731 | BAX/RELA/TP53/PPARG/SIRT1/MTOR/IGF1R | | 7 |
| hsa05221 | Acute myeloid leukemia | 6/137 | 67/8105 | 0.000895 | 0.00234342 | 0.000859208 | RELA/MAPK1/MYC/STAT3/MAPK3/MTOR | | 6 |
| hsa04152 | AMPK signaling pathway | 8/137 | 120/8105 | 0.000931 | 0.00241308 | 0.000884748 | PPARG/SLC2A4/HMGCR/SIRT1/GYS1/FBP1  /MTOR/IGF1R | | 8 |
| hsa04137 | Mitophagy - animal | 6/137 | 68/8105 | 0.000968 | 0.00248629 | 0.000911589 | JUN/RELA/TP53/MAPK8/E2F1/EIF2AK3 | | 6 |
| hsa05211 | Renal cell carcinoma | 6/137 | 69/8105 | 0.001046 | 0.00266024 | 0.00097537 | JUN/TGFB1/VEGFA/CDKN1A/MAPK1/MAPK3 | | 6 |
| hsa04622 | RIG-I-like receptor signaling pathway | 6/137 | 70/8105 | 0.001129 | 0.00281621 | 0.001032554 | CASP8/RELA/TNF/NFKBIA/MAPK8/CXCL8 | | 6 |
| hsa05120 | Epithelial cell signaling in Helicobacter pylori infection | 6/137 | 70/8105 | 0.001129 | 0.00281621 | 0.001032554 | JUN/CASP3/RELA/NFKBIA/MAPK8/CXCL8 | | 6 |
| hsa00982 | Drug metabolism - cytochrome P450 | 6/137 | 72/8105 | 0.001308 | 0.00323446 | 0.001185904 | CYP3A4/MAOA/CYP2C19/ADH1B/ADH7/  CYP2C9 | | 6 |
| hsa00591 | Linoleic acid metabolism | 4/137 | 29/8105 | 0.001336 | 0.00323804 | 0.001187218 | CYP3A4/CYP2C19/PLA2G4A/CYP2C9 | | 4 |
| hsa04672 | Intestinal immune network for IgA production | 5/137 | 49/8105 | 0.001346 | 0.00323804 | 0.001187218 | TGFB1/IL10/IL6/IL4/CD40LG | | 5 |
| hsa05030 | Cocaine addiction | 5/137 | 49/8105 | 0.001346 | 0.00323804 | 0.001187218 | JUN/RELA/SLC6A3/MAOA/DRD2 | | 5 |
| hsa04913 | Ovarian steroidogenesis | 5/137 | 51/8105 | 0.001614 | 0.00384812 | 0.001410903 | PTGS2/CYP17A1/HSD3B2/PLA2G4A/IGF1R | | 5 |
| hsa05310 | Asthma | 4/137 | 31/8105 | 0.001725 | 0.00407554 | 0.001494286 | IL10/TNF/IL4/CD40LG | | 4 |
| hsa04140 | Autophagy - animal | 8/137 | 137/8105 | 0.002179 | 0.00505952 | 0.001855058 | BCL2/MAPK1/MAPK8/MAPK3/ERN1/  MTOR/IGF1R/EIF2AK3 | | 8 |
| hsa04371 | Apelin signaling pathway | 8/137 | 137/8105 | 0.002179 | 0.00505952 | 0.001855058 | PIK3CG/MAPK1/NOS3/PLAT/SERPINE1  /MAPK3/AGTR1/MTOR | | 8 |
| hsa04662 | B cell receptor signaling pathway | 6/137 | 82/8105 | 0.002556 | 0.00588243 | 0.002156775 | JUN/RELA/MAPK1/NFKBIA/MAPK3/VAV1 | | 6 |
| hsa05204 | Chemical carcinogenesis | 6/137 | 83/8105 | 0.002717 | 0.00620092 | 0.002273547 | PTGS2/CYP3A4/CYP2C19/ADH1B/ADH7/CYP2C9 | | 6 |
| hsa00350 | Tyrosine metabolism | 4/137 | 36/8105 | 0.003025 | 0.00678786 | 0.002488749 | MAOA/TPO/ADH1B/ADH7 | | 4 |
| hsa00500 | Starch and sucrose metabolism | 4/137 | 36/8105 | 0.003025 | 0.00678786 | 0.002488749 | GCK/GYS1/PYGM/PYGL | | 4 |
| hsa05416 | Viral myocarditis | 5/137 | 60/8105 | 0.003325 | 0.00738804 | 0.002708804 | CASP9/CASP3/CASP8/ICAM1/CD40LG | | 5 |
| hsa04960 | Aldosterone-regulated sodium reabsorption | 4/137 | 37/8105 | 0.003348 | 0.00738804 | 0.002708804 | MAPK1/NR3C2/MAPK3/KCNJ1 | | 4 |
| hsa04072 | Phospholipase D signaling pathway | 8/137 | 148/8105 | 0.003518 | 0.0076994 | 0.002822961 | PIK3CG/MAPK1/CXCL8/PLA2G4A/MAPK3/AGTR1  /RAPGEF4/MTOR | | 8 |
| hsa04261 | Adrenergic signaling in cardiomyocytes | 8/137 | 150/8105 | 0.003818 | 0.0082581 | 0.003027807 | PIK3CG/ADRB2/BCL2/MAPK1/MAPK3/AGTR1  /ATP2A1/RAPGEF4 | | 8 |
| hsa04213 | Longevity regulating pathway - multiple species | 5/137 | 62/8105 | 0.003835 | 0.0082581 | 0.003027807 | SOD1/SIRT1/HDAC1/MTOR/IGF1R | | 5 |
| hsa04976 | Bile secretion | 6/137 | 90/8105 | 0.004072 | 0.00869796 | 0.003189082 | CYP3A4/RXRA/HMGCR/ABCC4/ABCG2/SLC10A1 | | 6 |
| hsa04623 | Cytosolic DNA-sensing pathway | 5/137 | 63/8105 | 0.00411 | 0.00870996 | 0.003193482 | RELA/IL6/NFKBIA/IL1B/CASP1 | | 5 |
| hsa05168 | Herpes simplex virus 1 infection | 17/137 | 498/8105 | 0.004222 | 0.00887648 | 0.003254535 | BCL2/BAX/CASP9/CASP3/CASP8/RELA/  TNF/IL6/TP53/NFKBIA/IFNG/IL1B/CCL2/JAK2/  TLR9/MTOR/EIF2AK3 | | 17 |
| hsa04921 | Oxytocin signaling pathway | 8/137 | 154/8105 | 0.004478 | 0.00934129 | 0.003424956 | PTGS2/PIK3CG/JUN/CDKN1A/MAPK1/NOS3/  PLA2G4A/MAPK3 | | 8 |
| hsa04611 | Platelet activation | 7/137 | 124/8105 | 0.004933 | 0.01021119 | 0.0037439 | PIK3CG/MAPK1/NOS3/COL1A1/PLA2G4A/  P2RY1/MAPK3 | | 7 |
| hsa04350 | TGF-beta signaling pathway | 6/137 | 94/8105 | 0.005041 | 0.01035441 | 0.003796414 | TGFB1/MAPK1/TNF/IFNG/MYC/MAPK3 | | 6 |
| hsa05332 | Graft-versus-host disease | 4/137 | 42/8105 | 0.005317 | 0.01083753 | 0.003973548 | TNF/IL6/IFNG/IL1B | | 4 |
| hsa05031 | Amphetamine addiction | 5/137 | 69/8105 | 0.006064 | 0.01226648 | 0.004497468 | JUN/SLC6A3/MAOA/SIRT1/HDAC1 | | 5 |
| hsa05231 | Choline metabolism in cancer | 6/137 | 98/8105 | 0.006171 | 0.01238784 | 0.004541962 | JUN/MAPK1/MAPK8/PLA2G4A/MAPK3/MTOR | | 6 |
| hsa05020 | Prion disease | 11/137 | 273/8105 | 0.006408 | 0.01276846 | 0.004681518 | BAX/CASP9/CASP3/MAPK1/TNF/IL6/MAPK8/SOD1  /IL1B/MAPK3/EIF2AK3 | | 11 |
| hsa04650 | Natural killer cell mediated cytotoxicity | 7/137 | 131/8105 | 0.006637 | 0.01312745 | 0.004813141 | CASP3/MAPK1/TNF/ICAM1/IFNG/MAPK3/VAV1 | | 7 |
| hsa04061 | Viral protein interaction with cytokine and cytokine receptor | 6/137 | 100/8105 | 0.0068 | 0.01334954 | 0.00489457 | IL10/TNF/IL6/CCL2/CXCL8/CCR2 | | 6 |
| hsa04022 | cGMP-PKG signaling pathway | 8/137 | 167/8105 | 0.007242 | 0.01411459 | 0.00517507 | PIK3CG/ADRB2/MAPK1/NOS3/ADRA2A/MAPK3  /AGTR1/ATP2A1 | | 8 |
| hsa00620 | Pyruvate metabolism | 4/137 | 47/8105 | 0.007942 | 0.01536532 | 0.005633647 | ALDH2/LDHA/ADH1B/ADH7 | | 4 |
| hsa04928 | Parathyroid hormone synthesis, secretion and action | 6/137 | 106/8105 | 0.008966 | 0.01722238 | 0.006314533 | BCL2/CDKN1A/MAPK1/RXRA/MAPK3/CASR | | 6 |
| hsa04015 | Rap1 signaling pathway | 9/137 | 210/8105 | 0.009093 | 0.0173419 | 0.006358353 | VEGFA/MAPK1/KDR/P2RY1/MAPK3/DRD2/VAV1  /RAPGEF4/IGF1R | | 9 |
| hsa05012 | Parkinson disease | 10/137 | 249/8105 | 0.009419 | 0.01783634 | 0.00653964 | BAX/CASP9/CASP3/TP53/MAPK8/SLC6A3/MAOA/  ERN1/DRD2/EIF2AK3 | | 10 |
| hsa04550 | Signaling pathways regulating pluripotency of stem cells | 7/137 | 143/8105 | 0.010528 | 0.01979603 | 0.007258153 | MAPK1/MYC/JAK2/STAT3/MAPK3/WNT3A/IGF1R | | 7 |
| hsa04060 | Cytokine-cytokine receptor interaction | 11/137 | 295/8105 | 0.011154 | 0.02082652 | 0.007635979 | TGFB1/IL10/TNF/IL6/IFNG/IL4/CD40LG/IL1B/CCL2  /CXCL8/CCR2 | | 11 |
| hsa05320 | Autoimmune thyroid disease | 4/137 | 53/8105 | 0.012065 | 0.022371 | 0.008202261 | IL10/IL4/CD40LG/TPO | | 4 |
| hsa05016 | Huntington disease | 11/137 | 306/8105 | 0.014365 | 0.0264509 | 0.009698142 | BAX/CASP9/CASP3/CASP8/TP53/PPARG/MAPK8  /SOD1/HDAC1/ERN1/MTOR | | 11 |
| hsa04935 | Growth hormone synthesis, secretion and action | 6/137 | 119/8105 | 0.015281 | 0.02794625 | 0.010246406 | MAPK1/MAPK8/JAK2/STAT3/MAPK3/MTOR | | 6 |
| hsa03410 | Base excision repair | 3/137 | 33/8105 | 0.017806 | 0.03233787 | 0.011856582 | PARP1/FEN1/PARP2 | | 3 |
| hsa05410 | Hypertrophic cardiomyopathy | 5/137 | 90/8105 | 0.017925 | 0.03233787 | 0.011856582 | TGFB1/TNF/IL6/ACE/ATP2A1 | | 5 |
| hsa04730 | Long-term depression | 4/137 | 60/8105 | 0.01836 | 0.03290098 | 0.012063044 | MAPK1/PLA2G4A/MAPK3/IGF1R | | 4 |
| hsa00140 | Steroid hormone biosynthesis | 4/137 | 61/8105 | 0.019398 | 0.03430004 | 0.012576005 | CYP3A4/CYP17A1/HSD3B2/CYP11B2 | | 4 |
| hsa00590 | Arachidonic acid metabolism | 4/137 | 61/8105 | 0.019398 | 0.03430004 | 0.012576005 | PTGS2/CYP2C19/PLA2G4A/CYP2C9 | | 4 |
| hsa04020 | Calcium signaling pathway | 9/137 | 240/8105 | 0.020272 | 0.03554782 | 0.0130335 | HTR2A/ADRB2/VEGFA/NOS3/KDR/AGTR1/P2RX3  /ATP2A1/P2RX7 | | 9 |
| hsa04912 | GnRH signaling pathway | 5/137 | 93/8105 | 0.02037 | 0.03554782 | 0.0130335 | JUN/MAPK1/MAPK8/PLA2G4A/MAPK3 | | 5 |
| hsa05217 | Basal cell carcinoma | 4/137 | 63/8105 | 0.021581 | 0.03741586 | 0.013718412 | BAX/CDKN1A/TP53/WNT3A | | 4 |
| hsa04927 | Cortisol synthesis and secretion | 4/137 | 65/8105 | 0.023908 | 0.04118345 | 0.015099788 | CYP17A1/HSD3B2/AGTR1/KCNK3 | | 4 |
| hsa04750 | Inflammatory mediator regulation of TRP channels | 5/137 | 98/8105 | 0.024913 | 0.04263872 | 0.015633355 | HTR2A/MAPK8/IL1B/PLA2G4A/F2RL1 | | 5 |
| hsa04141 | Protein processing in endoplasmic reticulum | 7/137 | 171/8105 | 0.025657 | 0.04363325 | 0.015998 | BCL2/BAX/MAPK8/ERN1/HSP90AA1/CAPN1  /EIF2AK3 | | 7 |
| hsa04640 | Hematopoietic cell lineage | 5/137 | 99/8105 | 0.025893 | 0.04375585 | 0.016042951 | TNF/IL6/IL4/IL1B/MME | | 5 |
| hsa04914 | Progesterone-mediated oocyte maturation | 5/137 | 100/8105 | 0.026898 | 0.04516814 | 0.016560762 | MAPK1/MAPK8/MAPK3/HSP90AA1/IGF1R | | 5 |
| hsa00830 | Retinol metabolism | 4/137 | 68/8105 | 0.027675 | 0.04618205 | 0.01693251 | CYP3A4/ADH1B/ADH7/CYP2C9 | | 4 |
| hsa04924 | Renin secretion | 4/137 | 69/8105 | 0.029005 | 0.04810064 | 0.017635952 | ADRB2/ACE/AGTR1/REN | | 4 |

**Table S5** Binding Energy between Selected Targets and Active Compounds

|  | | Binding energy (kcal/mol) | | | | |
| --- | --- | --- | --- | --- | --- | --- |
| Target | Structure | Quercetin | 3'-Hydroxyflavanone | Beta-sitosterol | Methetoin | Diphenylhydantoic  Acid |
| IL6 | IIL6 | −7.1 | −7.2 | −7.3 | −7.2 | −7.0 |
| TNF | 1A8M | −6.6 | −8.6 | −6.3 | −8.6 | −8.9 |
| IL-1β | 1T4Q | −6.8 | −6.3 | −7.7 | −6.3 | −6.7 |
| STAT3 | 6NJS | −8.0 | −6.9 | −7.6 | −6.9 | −6.7 |
| VEGFA | 1MKK | −7.3 | −7.4 | −7.6 | −7.4 | −8.4 |
| SIRT1 | 4I5I | −7.3 | −8.9 | −7.2 | −8.7 | −8.9 |
